# Supplementary material for: Spotted hyaena space use in relation to human infrastructure inside a protected area
Source: PeerJ. 2016 Oct 19;4:e2596. doi: 10.7717/peerj.2596 (PMC5075705; doi:10.7717/peerj.2596)
Supplement: Supplemental Information 2 [file peerj-04-2596-s002.csv]

Clan	Date time	Season	Active	X	Y
Doispane a	2007/11/22 02:01:00	Wet	Active	338568.824896	7232450.94737
Doispane a	2007/11/22 20:02:00	Wet	Active	341026.865446	7232597.84657
Doispane a	2007/11/23 23:01:00	Wet	Active	341362.490769	7232432.27227
Doispane a	2007/11/24 20:03:00	Wet	Active	341737.017719	7231761.65092
Doispane a	2007/11/25 05:02:00	Wet	Active	340305.897661	7231294.04596
Doispane a	2007/11/25 14:03:00	Wet	Resting	339395.2239	7230874.78244
Doispane a	2007/11/25 23:01:00	Wet	Active	341854.752822	7232074.69125
Doispane a	2007/11/26 17:02:00	Wet	Resting	339395.366964	7230862.61435
Doispane a	2007/11/27 02:02:00	Wet	Active	337804.072496	7232762.59194
Doispane a	2007/11/27 20:02:00	Wet	Active	342755.1635	7234345.68535
Doispane a	2007/11/28 14:01:00	Wet	Resting	339636.822019	7230741.49984
Doispane a	2007/11/28 23:01:00	Wet	Active	341666.102567	7232175.498
Doispane a	2007/11/29 17:04:00	Wet	Resting	338676.683994	7231020.6918
Doispane a	2007/11/30 02:01:00	Wet	Active	341974.96217	7231694.76744
Doispane a	2007/12/01 23:02:00	Wet	Active	341689.405773	7232060.6073
Doispane a	2007/12/02 11:02:00	Wet	Resting	338352.028651	7233522.70808
Doispane a	2007/12/02 20:02:00	Wet	Active	340204.246434	7233139.04633
Doispane a	2007/12/03 05:02:00	Wet	Active	341301.919647	7232431.56915
Doispane a	2007/12/03 14:02:00	Wet	Resting	339998.657844	7232561.51081
Doispane a	2007/12/03 23:01:00	Wet	Active	341191.868089	7232642.13286
Doispane a	2007/12/04 08:04:00	Wet	Resting	340103.579093	7230913.29133
Doispane a	2007/12/04 17:04:00	Wet	Resting	340159.096261	7230871.57238
Doispane a	2007/12/05 02:01:00	Wet	Active	341107.586834	7232296.12148
Doispane a	2007/12/05 11:02:00	Wet	Resting	339808.058542	7230707.22524
Doispane a	2007/12/05 20:01:00	Wet	Active	341685.212713	7229570.06485
Doispane a	2007/12/06 14:01:00	Wet	Resting	340161.685749	7230895.94213
Doispane a	2007/12/06 23:01:00	Wet	Active	339970.572319	7235436.15824
Doispane a	2007/12/08 02:01:00	Wet	Active	338337.214418	7232448.21007
Doispane a	2007/12/08 20:01:00	Wet	Active	339417.534038	7231335.01679
Doispane a	2007/12/10 11:02:00	Wet	Resting	340212.969528	7230742.16691
Doispane a	2007/12/10 20:01:00	Wet	Active	342620.471759	7230721.66475
Doispane a	2007/12/11 23:01:00	Wet	Active	341745.144573	7230581.51639
Doispane a	2007/12/13 02:01:00	Wet	Active	341389.885404	7230550.12644
Doispane a	2007/12/13 20:01:00	Wet	Active	342853.439074	7232031.67348
Doispane a	2007/12/16 02:02:00	Wet	Active	336237.19608	7236018.51729
Doispane a	2007/12/17 23:01:00	Wet	Active	340377.708373	7235767.91563
Doispane a	2007/12/18 11:02:00	Wet	Resting	337192.492508	7232228.8624
Doispane a	2007/12/18 20:01:00	Wet	Active	338898.851502	7231822.23783
Doispane a	2007/12/19 05:02:00	Wet	Active	339061.91551	7232029.91854
Doispane a	2007/12/19 14:02:00	Wet	Resting	337802.068112	7231996.99503
Doispane a	2007/12/19 23:02:00	Wet	Active	341101.540168	7234247.92523
Doispane a	2007/12/20 08:02:00	Wet	Resting	337083.592077	7232354.67245
Doispane a	2007/12/21 02:02:00	Wet	Active	338319.707301	7236258.27088
Doispane a	2007/12/24 02:02:00	Wet	Active	338698.692694	7234289.44006
Doispane a	2007/12/24 20:01:00	Wet	Active	340374.029291	7232299.5184
Doispane a	2007/12/25 23:02:00	Wet	Active	341823.103227	7232183.40074
Doispane a	2007/12/26 20:01:00	Wet	Active	340039.258385	7231917.442
Doispane a	2007/12/27 05:01:00	Wet	Active	339311.394596	7232381.04434
Doispane a	2007/12/27 23:02:00	Wet	Active	341050.265034	7236293.17549
Doispane a	2007/12/28 17:04:00	Wet	Resting	340600.184113	7234196.79402
Doispane a	2007/12/29 02:03:00	Wet	Active	339629.088998	7232100.1389
Doispane a	2007/12/29 20:01:00	Wet	Active	341148.089771	7233564.48809
Doispane a	2007/12/30 14:04:00	Wet	Resting	340768.541044	7230869.67553
Doispane a	2008/01/01 02:02:00	Wet	Active	340943.258058	7230553.94711
Doispane a	2008/01/02 23:01:00	Wet	Active	341742.059905	7232993.31898
Doispane a	2008/01/03 20:01:00	Wet	Active	339323.37227	7232305.46224
Doispane a	2008/01/04 05:02:00	Wet	Active	339353.937898	7232290.72202
Doispane a	2008/01/04 23:01:00	Wet	Active	339361.623576	7231863.96951
Doispane a	2008/01/05 08:03:00	Wet	Resting	339297.958271	7232353.61711
Doispane a	2008/01/06 02:01:00	Wet	Active	340172.999014	7231807.00039
Doispane a	2008/01/06 20:01:00	Wet	Active	339840.399252	7232187.35417
Doispane a	2008/01/07 23:02:00	Wet	Active	335620.218938	7235720.62205
Doispane a	2008/01/09 02:01:00	Wet	Active	337115.622453	7234751.84116
Doispane a	2008/01/09 20:02:00	Wet	Active	337834.76694	7235977.13761
Doispane a	2008/01/10 23:01:00	Wet	Active	339728.665088	7234186.6103
Doispane a	2008/01/12 05:02:00	Wet	Active	338252.008468	7235225.29508
Doispane a	2008/01/12 23:01:00	Wet	Active	342564.113637	7232013.24426
Doispane a	2008/01/13 08:02:00	Wet	Resting	338132.230298	7235314.7014
Doispane a	2008/01/14 02:01:00	Wet	Active	339403.95326	7232018.8426
Doispane a	2008/01/14 20:01:00	Wet	Active	339556.436912	7232184.02365
Doispane a	2008/01/15 14:04:00	Wet	Resting	336955.704053	7235899.98677
Doispane a	2008/01/15 23:01:00	Wet	Active	339249.801108	7232222.78936
Doispane a	2008/01/17 02:01:00	Wet	Active	338764.209688	7235282.94828
Doispane a	2008/01/18 23:03:00	Wet	Active	337832.241127	7235964.9379
Doispane a	2008/01/19 11:02:00	Wet	Resting	339957.494415	7234201.23388
Doispane a	2008/01/19 20:01:00	Wet	Active	340827.024871	7233905.7867
Doispane a	2008/01/20 05:01:00	Wet	Active	341217.875038	7232542.3735
Doispane a	2008/01/21 08:04:00	Wet	Resting	341732.61788	7232851.00562
Doispane a	2008/01/22 02:01:00	Wet	Active	340977.888432	7232306.55739
Doispane a	2008/01/22 20:01:00	Wet	Active	341061.437734	7232467.98828
Doispane a	2008/01/23 23:02:00	Wet	Active	340823.892487	7232516.60713
Doispane a	2008/01/24 17:04:00	Wet	Resting	339943.933298	7232061.46107
Doispane a	2008/01/25 02:04:00	Wet	Active	341654.360368	7234608.38051
Doispane a	2008/01/25 20:03:00	Wet	Active	340389.358265	7235244.53158
Doispane a	2008/01/26 23:02:00	Wet	Active	337045.75753	7234133.72721
Doispane a	2008/01/27 11:03:00	Wet	Resting	339032.18486	7231503.11282
Doispane a	2008/01/27 20:02:00	Wet	Active	338878.652868	7232124.66672
Doispane a	2008/01/28 05:02:00	Wet	Active	341792.369004	7232461.36846
Doispane a	2008/01/28 14:02:00	Wet	Resting	341744.224212	7232575.74632
Doispane a	2008/01/28 23:03:00	Wet	Active	339999.246125	7232283.1919
Doispane a	2008/01/29 08:02:00	Wet	Resting	340066.389004	7232196.08538
Doispane a	2008/01/29 17:03:00	Wet	Resting	340144.049147	7232157.78042
Doispane a	2008/01/30 02:02:00	Wet	Active	341076.481537	7232834.37937
Doispane a	2008/01/30 20:04:00	Wet	Active	339318.938092	7236442.43904
Doispane a	2008/01/31 14:02:00	Wet	Resting	339717.185689	7231172.21557
Doispane a	2008/01/31 23:01:00	Wet	Active	342262.770194	7233516.99383
Doispane a	2008/02/01 17:03:00	Wet	Resting	339175.925417	7231241.35234
Doispane a	2008/02/02 02:03:00	Wet	Active	335437.569975	7234852.78422
Doispane a	2008/02/02 20:01:00	Wet	Active	338351.421699	7235677.427
Doispane a	2008/02/03 23:01:00	Wet	Active	339865.063849	7232202.96801
Doispane a	2008/02/04 20:02:00	Wet	Active	340342.767915	7232620.07251
Doispane a	2008/02/05 05:01:00	Wet	Active	339536.463174	7231996.28497
Doispane a	2008/02/05 23:02:00	Wet	Active	340563.941672	7233993.54409
Doispane a	2008/02/07 02:01:00	Wet	Active	338181.293261	7232331.42793
Doispane a	2008/02/09 17:02:00	Wet	Resting	339353.018781	7231897.22251
Doispane a	2008/02/11 17:01:00	Wet	Resting	339547.516101	7231999.34449
Doispane a	2008/02/13 11:02:00	Wet	Resting	339344.600686	7231897.12355
Doispane a	2008/02/13 22:03:00	Wet	Active	342053.786836	7232034.6247
Doispane a	2008/02/15 16:01:00	Wet	Resting	339353.053217	7231894.29315
Doispane a	2008/02/20 13:03:00	Wet	Resting	339347.475157	7231897.15734
Doispane a	2008/02/21 11:01:00	Wet	Resting	339353.053217	7231894.29315
Doispane a	2008/02/27 17:02:00	Wet	Active	338332.436862	7232157.65568
Doispane a	2008/02/28 13:02:00	Wet	Resting	339551.208071	7231929.74986
Doispane a	2008/02/29 22:01:00	Wet	Active	342637.103247	7232861.44674
Doispane a	2008/03/01 20:01:00	Wet	Active	340030.93108	7234050.87332
Doispane a	2008/03/04 23:01:00	Wet	Active	340142.280725	7232308.9796
Doispane a	2008/03/05 08:01:00	Wet	Resting	339508.950193	7231995.9619
Doispane a	2008/03/06 17:03:00	Wet	Active	338720.380884	7235028.2194
Doispane a	2008/03/08 11:03:00	Wet	Resting	337946.208613	7231929.06646
Doispane a	2008/03/13 08:02:00	Wet	Resting	340395.340029	7232602.4319
Doispane a	2008/03/16 11:02:00	Wet	Resting	339440.774709	7232170.721
Doispane a	2008/03/16 22:02:00	Wet	Active	334101.336517	7236540.67474
Doispane a	2008/03/18 05:02:00	Wet	Active	335938.073382	7231296.83331
Doispane a	2008/03/19 14:01:00	Wet	Resting	338616.175242	7230771.84809
Doispane a	2008/03/20 01:01:00	Wet	Active	339561.164134	7232008.74471
Doispane a	2008/03/20 23:03:00	Wet	Active	338575.374775	7231201.14081
Doispane a	2008/03/21 08:01:00	Wet	Resting	339411.951637	7232037.19121
Doispane a	2008/03/22 17:01:00	Wet	Active	339404.024754	7232012.75856
Doispane a	2008/03/24 00:01:00	Wet	Active	335782.538057	7234826.72942
Doispane a	2008/03/24 11:02:00	Wet	Resting	339514.890113	7232189.62073
Doispane a	2008/03/26 05:01:00	Wet	Active	335623.212768	7234770.27692
Doispane a	2008/04/01 00:01:00	Dry	Active	340078.222667	7230483.448
Doispane a	2008/04/03 16:03:00	Dry	Resting	339543.67494	7232099.13636
Doispane a	2008/04/04 14:02:00	Dry	Resting	340998.556198	7229825.31119
Doispane a	2008/04/05 01:01:00	Dry	Active	338920.783411	7231825.6515
Doispane a	2008/04/05 23:02:00	Dry	Active	343062.852502	7229640.28263
Doispane a	2008/04/06 08:02:00	Dry	Resting	339492.849031	7232195.44678
Doispane a	2008/04/07 17:01:00	Dry	Active	341443.174195	7231655.25337
Doispane a	2008/04/08 13:03:00	Dry	Resting	339402.849093	7232112.80715
Doispane a	2008/04/09 00:01:00	Dry	Active	335328.84013	7233562.36181
Doispane a	2008/04/11 16:01:00	Dry	Resting	339472.090358	7232319.37944
Doispane a	2008/04/12 14:01:00	Dry	Resting	339750.701567	7231378.36755
Doispane a	2008/04/13 01:02:00	Dry	Active	335186.639171	7233006.68917
Doispane a	2008/04/15 17:02:00	Dry	Active	339541.260762	7232059.8944
Doispane a	2008/04/16 13:01:00	Dry	Resting	339134.316398	7232194.38669
Doispane a	2008/04/17 00:01:00	Dry	Active	341385.515167	7232111.62174
Doispane a	2008/04/17 11:01:00	Dry	Resting	338854.613672	7232299.94367
Doispane a	2008/04/17 22:02:00	Dry	Active	339930.211074	7232058.37061
Doispane a	2008/04/18 20:01:00	Dry	Active	340362.941762	7232299.38891
Doispane a	2008/04/19 05:01:00	Dry	Active	340819.147971	7231971.84664
Doispane a	2008/04/19 16:01:00	Dry	Resting	339685.486329	7231528.82284
Doispane a	2008/04/20 14:03:00	Dry	Resting	339634.834574	7231383.09295
Doispane a	2008/04/21 01:02:00	Dry	Active	341352.529111	7232105.15405
Doispane a	2008/04/22 08:01:00	Dry	Resting	334776.752303	7234058.05322
Doispane a	2008/04/22 19:02:00	Dry	Active	337292.702146	7232384.43279
Doispane a	2008/04/23 17:01:00	Dry	Active	339593.12058	7232102.87191
Doispane a	2008/04/24 13:03:00	Dry	Resting	340149.629756	7232154.69058
Doispane a	2008/04/25 00:02:00	Dry	Active	339946.968975	7235575.15729
Doispane a	2008/04/25 11:02:00	Dry	Resting	340099.409149	7232199.62684
Doispane a	2008/04/25 22:01:00	Dry	Active	341341.40516	7232108.18001
Doispane a	2008/04/27 05:03:00	Dry	Active	342182.629375	7229236.877
Doispane a	2008/04/27 16:04:00	Dry	Resting	340149.558598	7232160.7746
Doispane a	2008/05/02 13:03:00	Dry	Resting	339972.312422	7232461.36571
Doispane a	2008/05/03 00:01:00	Dry	Active	340387.78604	7232299.67905
Doispane a	2008/05/03 11:04:00	Dry	Resting	340602.364388	7232353.79161
Doispane a	2008/05/03 22:01:00	Dry	Active	341353.336441	7231805.65507
Doispane a	2008/05/04 20:02:00	Dry	Active	340379.641476	7232293.72446
Doispane a	2008/05/05 05:03:00	Dry	Active	338016.082932	7234420.6505
Doispane a	2008/05/08 08:01:00	Dry	Resting	339843.896736	7232589.89739
Doispane a	2008/05/11 00:02:00	Dry	Active	334643.459076	7232767.09716
Doispane a	2008/05/11 11:04:00	Dry	Resting	339528.033624	7230616.04553
Doispane a	2008/05/11 22:01:00	Dry	Active	340582.782606	7232377.67723
Doispane a	2008/05/12 20:01:00	Dry	Active	340582.782606	7232377.67723
Doispane a	2008/05/13 05:01:00	Dry	Active	340582.39365	7232411.02662
Doispane a	2008/05/13 16:01:00	Dry	Resting	340575.521015	7232296.01061
Doispane a	2008/05/14 14:01:00	Dry	Resting	340578.190232	7232296.04175
Doispane a	2008/05/15 01:04:00	Dry	Active	335844.965463	7233989.10587
Doispane a	2008/05/15 23:01:00	Dry	Active	340579.837088	7232383.72772
Doispane a	2008/05/16 08:02:00	Dry	Resting	340540.298964	7232710.04489
Doispane a	2008/05/16 19:01:00	Dry	Active	340577.096892	7232389.78059
Doispane a	2008/05/17 17:01:00	Dry	Active	340696.574637	7232551.63295
Doispane a	2008/05/19 00:01:00	Dry	Active	341103.089206	7232453.37316
Doispane a	2008/05/19 11:02:00	Dry	Resting	340735.03718	7232564.02544
Doispane a	2008/05/19 22:02:00	Dry	Active	343790.090633	7229457.96655
Doispane a	2008/05/20 20:01:00	Dry	Active	340585.451839	7232377.70836
Doispane a	2008/05/21 05:02:00	Dry	Active	340577.062726	7232392.70993
Doispane a	2008/05/23 01:01:00	Dry	Active	341546.042878	7228736.18001
Doispane a	2008/05/23 23:01:00	Dry	Active	340582.677483	7232386.69058
Doispane a	2008/05/24 19:01:00	Dry	Active	340574.146438	7232413.86017
Doispane a	2008/05/25 17:02:00	Dry	Active	340637.985891	7232363.22155
Doispane a	2008/05/26 13:02:00	Dry	Resting	340791.579518	7232434.64899
Doispane a	2008/05/27 22:01:00	Dry	Active	341514.619064	7228348.41357
Doispane a	2008/05/29 05:02:00	Dry	Active	343606.202451	7229631.4182
Doispane a	2008/05/29 16:01:00	Dry	Resting	341059.963299	7232365.20521
Doispane a	2008/05/30 14:01:00	Dry	Resting	341628.38284	7232577.55979
Doispane a	2008/05/31 01:01:00	Dry	Active	343972.89945	7229396.5051
Doispane a	2008/06/01 08:01:00	Dry	Resting	341048.666113	7232383.10295
Doispane a	2008/06/02 17:01:00	Dry	Active	341065.543758	7232362.11501
Doispane a	2008/06/04 00:01:00	Dry	Active	342165.350233	7228582.89714
Doispane a	2008/06/05 20:01:00	Dry	Active	343627.789765	7232086.07854
Doispane a	2008/06/06 05:01:00	Dry	Active	333484.352589	7235788.55902
Doispane a	2008/06/06 16:02:00	Dry	Resting	341057.118515	7232380.27151
Doispane a	2008/06/07 14:02:00	Dry	Resting	341052.033299	7232340.77369
Doispane a	2008/06/08 01:01:00	Dry	Active	335918.052977	7232724.98543
Doispane a	2008/06/08 23:02:00	Dry	Active	333248.555746	7234084.80792
Doispane a	2008/06/09 08:01:00	Dry	Resting	341051.540667	7232383.13638
Doispane a	2008/06/09 19:01:00	Dry	Active	341856.055728	7232192.79659
Doispane a	2008/06/11 13:02:00	Dry	Resting	341038.030207	7232361.79505
Doispane a	2008/06/12 00:03:00	Dry	Active	336336.881721	7235532.46372
Doispane a	2008/06/12 11:02:00	Dry	Resting	341032.381603	7232370.74392
Doispane a	2008/06/12 22:02:00	Dry	Active	341052.952	7228222.02283
Doispane a	2008/06/14 16:01:00	Dry	Resting	341051.257669	7232407.47239
Doispane a	2008/06/15 14:03:00	Dry	Resting	341032.486431	7232361.73058
Doispane a	2008/06/16 01:02:00	Dry	Active	342594.163446	7228693.77056
Doispane a	2008/06/16 23:01:00	Dry	Active	332967.82873	7235612.78605
Doispane a	2008/06/17 08:01:00	Dry	Resting	340347.251251	7232710.9468
Doispane a	2008/06/18 17:01:00	Dry	Active	341067.800515	7233121.84254
Doispane a	2008/06/19 13:02:00	Dry	Resting	340017.120842	7231230.04423
Doispane a	2008/06/20 11:01:00	Dry	Resting	340726.424269	7232827.37578
Doispane a	2008/06/20 22:01:00	Dry	Active	335157.189491	7233626.77795
Doispane a	2008/06/22 16:02:00	Dry	Resting	341102.153457	7232056.94721
Doispane a	2008/06/25 08:01:00	Dry	Resting	340902.8555	7232366.30714
Doispane a	2008/06/28 00:01:00	Dry	Active	337066.372759	7232868.98272
Doispane a	2008/06/28 11:01:00	Dry	Resting	340922.226876	7232360.44778
Doispane a	2008/06/28 22:01:00	Dry	Active	341530.33222	7228427.24828
Doispane a	2008/06/30 05:01:00	Dry	Active	337573.592746	7234739.2563
Doispane a	2008/07/01 14:03:00	Dry	Resting	337132.404468	7235896.00542
Doispane a	2008/07/02 01:01:00	Dry	Active	341051.395788	7232625.17548
Doispane a	2008/07/02 23:01:00	Dry	Active	336485.144335	7235346.72969
Doispane a	2008/07/03 08:01:00	Dry	Resting	340398.094738	7232366.50736
Doispane a	2008/07/03 19:01:00	Dry	Active	340418.103047	7232306.1179
Doispane a	2008/07/04 17:02:00	Dry	Active	328845.390732	7234626.76767
Doispane a	2008/07/05 13:03:00	Dry	Resting	339826.865755	7232641.30646
Doispane a	2008/07/06 00:01:00	Dry	Active	340356.966408	7232353.85736
Doispane a	2008/07/06 11:02:00	Dry	Resting	338206.758673	7234622.58154
Doispane a	2008/07/06 22:01:00	Dry	Active	340387.820248	7232296.74971
Doispane a	2008/07/07 20:01:00	Dry	Active	341075.92361	7232652.72968
Doispane a	2008/07/09 14:03:00	Dry	Resting	340017.083901	7231233.19892
Doispane a	2008/07/10 23:01:00	Dry	Active	337965.232526	7236148.15793
Doispane a	2008/07/11 08:04:00	Dry	Resting	339978.485828	7231232.74688
Doispane a	2008/07/12 17:03:00	Dry	Active	339984.029169	7231232.81181
Doispane a	2008/07/13 13:03:00	Dry	Resting	340181.872511	7232224.7054
Doispane a	2008/07/14 11:02:00	Dry	Resting	340190.156595	7232218.71742
Doispane a	2008/07/15 20:01:00	Dry	Active	340387.78604	7232299.67905
Doispane a	2008/07/16 05:01:00	Dry	Active	340125.359219	7232351.15028
Doispane a	2008/07/16 16:01:00	Dry	Resting	340130.626524	7232357.29674
Doispane a	2008/07/18 01:01:00	Dry	Active	335358.568901	7236144.10096
Doispane a	2008/07/18 23:01:00	Dry	Active	338486.490654	7236381.26084
Doispane a	2008/07/19 08:01:00	Dry	Resting	336243.06087	7233915.22421
Doispane a	2008/07/19 19:02:00	Dry	Active	336703.862324	7237140.78765
Doispane a	2008/07/20 17:02:00	Dry	Active	340162.287488	7232248.81579
Doispane a	2008/07/21 13:01:00	Dry	Resting	340119.744263	7232357.16946
Doispane a	2008/07/22 00:01:00	Dry	Active	337949.18061	7236341.55745
Doispane a	2008/07/22 11:04:00	Dry	Resting	339992.207217	7231235.83734
Doispane a	2008/07/23 20:01:00	Dry	Active	341570.028753	7233094.31753
Doispane a	2008/07/24 05:02:00	Dry	Active	338321.037855	7236615.26585
Doispane a	2008/07/24 16:01:00	Dry	Resting	340105.953173	7232359.93788
Doispane a	2008/07/25 14:01:00	Dry	Resting	340122.695519	7232333.08993
Doispane a	2008/07/26 01:01:00	Dry	Active	338182.703077	7235475.75899
Doispane a	2008/07/26 23:01:00	Dry	Active	340209.57082	7232455.12673
Doispane a	2008/07/27 08:01:00	Dry	Resting	340194.319801	7232336.85728
Doispane a	2008/07/27 19:01:00	Dry	Active	339933.975242	7232911.87222
Doispane a	2008/07/28 17:01:00	Dry	Active	331635.439103	7235402.86524
Doispane a	2008/07/29 13:02:00	Dry	Resting	340114.095035	7232366.11797
Doispane a	2008/07/30 00:01:00	Dry	Active	334404.32631	7233384.64895
Doispane a	2008/07/30 22:01:00	Dry	Active	331362.505222	7233598.76654
Doispane a	2008/07/31 20:01:00	Dry	Active	331457.933616	7235255.31438
Doispane a	2008/08/01 05:01:00	Dry	Active	339482.193086	7230515.6697
Doispane a	2008/08/01 16:03:00	Dry	Resting	339306.24285	7232347.62963
Doispane b	2008/08/02 14:03:00	Dry	Resting	331100.614387	7235148.13843
Doispane b	2008/08/03 01:04:00	Dry	Active	331364.986198	7234963.66247
Doispane b	2008/08/03 23:02:00	Dry	Active	332216.683133	7236581.26486
Doispane b	2008/08/07 11:01:00	Dry	Resting	331223.354735	7235255.57856
Doispane b	2008/08/07 22:01:00	Dry	Active	329450.393791	7235657.30452
Doispane b	2008/08/08 20:02:00	Dry	Active	333334.933609	7236504.09735
Doispane b	2008/08/09 05:01:00	Dry	Active	332009.45501	7237280.75954
Doispane b	2008/08/09 16:02:00	Dry	Resting	331015.553984	7235116.66279
Doispane b	2008/08/10 14:03:00	Dry	Resting	326698.39694	7234490.65686
Doispane b	2008/08/11 23:01:00	Dry	Active	326592.923706	7235406.38908
Doispane b	2008/08/14 13:03:00	Dry	Resting	331114.972446	7235099.86021
Doispane b	2008/08/15 00:01:00	Dry	Active	328474.269251	7235393.81139
Doispane b	2008/08/15 11:02:00	Dry	Resting	331274.886544	7235340.95459
Doispane b	2008/08/15 22:01:00	Dry	Active	324663.732222	7231186.99718
Doispane b	2008/08/16 20:01:00	Dry	Active	331652.093608	7236286.75878
Doispane b	2008/08/17 16:01:00	Dry	Resting	330813.552268	7235389.57434
Doispane b	2008/08/18 14:03:00	Dry	Resting	328197.78654	7235229.87471
Doispane b	2008/08/19 23:01:00	Dry	Active	326571.154091	7234952.19924
Doispane b	2008/08/20 19:01:00	Dry	Active	330918.09668	7236304.9838
Doispane b	2008/08/21 17:01:00	Dry	Active	331401.273785	7235602.81881
Doispane b	2008/08/22 13:02:00	Dry	Resting	331086.893194	7235144.81383
Doispane b	2008/08/23 11:02:00	Dry	Resting	331271.936243	7235347.00331
Doispane b	2008/08/23 22:01:00	Dry	Active	335404.120268	7233962.62314
Doispane b	2008/08/25 16:01:00	Dry	Resting	331089.52413	7235148.00155
Doispane b	2008/08/26 14:03:00	Dry	Resting	331089.487972	7235150.93096
Doispane b	2008/08/27 01:01:00	Dry	Active	327225.654142	7234231.15332
Doispane b	2008/08/27 23:01:00	Dry	Active	330729.001056	7235748.67717
Doispane b	2008/08/30 13:02:00	Dry	Resting	331269.194095	7235352.82922
Doispane b	2008/08/31 00:02:00	Dry	Active	332529.738198	7236700.03713
Doispane b	2008/08/31 11:01:00	Dry	Resting	331272.011254	7235340.91914
Doispane b	2008/09/01 20:01:00	Dry	Active	331092.082217	7235390.0849
Doispane b	2008/09/02 16:01:00	Dry	Resting	331230.880359	7235328.24178
Doispane b	2008/09/03 14:03:00	Dry	Resting	331274.925439	7235337.79983
Doispane b	2008/09/04 23:01:00	Dry	Active	334097.359602	7235275.62187
Doispane b	2008/09/05 08:01:00	Dry	Resting	331258.064782	7235355.84723
Doispane b	2008/09/07 13:02:00	Dry	Resting	331095.219452	7235135.90164
Doispane b	2008/09/08 00:02:00	Dry	Active	336203.368946	7236081.66638
Doispane b	2008/09/08 11:01:00	Dry	Resting	331266.541066	7235334.7666
Doispane b	2008/09/08 22:02:00	Dry	Active	328412.09436	7235962.10907
Doispane b	2008/09/12 01:01:00	Dry	Active	332310.601613	7236343.29532
Doispane b	2008/09/13 08:01:00	Dry	Resting	331174.381591	7235212.60418
Doispane b	2008/09/13 19:01:00	Dry	Active	331232.730515	7235394.7499
Doispane b	2008/09/16 11:01:00	Dry	Resting	331269.45525	7235331.64729
Doispane b	2008/09/16 22:01:00	Dry	Active	325521.614195	7232030.31413
Doispane b	2008/09/17 20:01:00	Dry	Active	334777.647276	7234902.30066
Doispane b	2008/09/18 16:02:00	Dry	Resting	331177.015341	7235215.56653
Doispane b	2008/09/19 14:03:00	Dry	Resting	331274.925439	7235337.79983
Doispane b	2008/09/20 01:02:00	Dry	Active	326489.07901	7234896.61691
Doispane b	2008/09/20 23:01:00	Dry	Active	331612.412698	7235254.28619
Doispane b	2008/09/21 19:02:00	Dry	Active	325898.715499	7235334.0184
Doispane b	2008/09/22 17:01:00	Dry	Active	330605.207893	7234830.09629
Doispane b	2008/09/24 00:01:00	Dry	Active	331173.411396	7235291.24774
Doispane b	2008/09/24 22:01:00	Dry	Active	326157.803523	7235782.21149
Doispane b	2008/09/25 20:01:00	Dry	Active	328444.870159	7232251.90522
Doispane b	2008/09/28 01:01:00	Dry	Active	325455.290104	7235924.72706
Doispane b	2008/10/02 00:02:00	Wet	Active	324322.937098	7235816.25764
Doispane b	2008/10/02 22:01:00	Wet	Active	331156.834877	7237518.41143
Doispane b	2008/10/06 23:01:00	Wet	Active	324820.945487	7235265.94822
Doispane b	2008/10/10 00:01:00	Wet	Active	326516.423911	7233177.99239
Doispane b	2008/10/10 11:04:00	Wet	Resting	330903.364311	7235036.62126
Doispane b	2008/10/10 22:02:00	Wet	Active	326995.627894	7233450.23699
Doispane b	2008/10/11 20:01:00	Wet	Active	324224.750504	7233369.59947
Doispane b	2008/10/14 01:01:00	Wet	Active	325805.426676	7233126.58146
Doispane b	2008/10/14 23:02:00	Wet	Active	326142.805185	7234359.64861
Doispane b	2008/10/16 17:01:00	Wet	Active	328195.502535	7232566.55636
Doispane b	2008/10/18 00:03:00	Wet	Active	329832.626312	7235743.64785
Doispane b	2008/10/18 22:01:00	Wet	Active	328080.860181	7234432.59771
Doispane b	2008/10/19 20:01:00	Wet	Active	328054.890567	7235845.61441
Doispane b	2008/10/22 23:03:00	Wet	Active	326918.908888	7235147.273
Doispane b	2008/10/23 08:01:00	Wet	Resting	331074.663036	7235020.70707
Doispane b	2008/10/23 19:01:00	Wet	Active	333385.333147	7235536.29036
Doispane b	2008/10/26 00:01:00	Wet	Active	326849.978607	7235140.31576
Doispane b	2008/10/26 22:01:00	Wet	Active	329702.688842	7237321.91284
Doispane b	2008/10/28 05:02:00	Wet	Active	326916.671336	7232710.89449
Doispane b	2008/10/30 01:01:00	Wet	Active	333600.584284	7236213.67007
Doispane b	2008/10/30 23:01:00	Wet	Active	328173.188309	7235438.49076
Doispane b	2008/10/31 19:01:00	Wet	Active	326854.079305	7233518.08777
Doispane b	2008/11/01 17:02:00	Wet	Resting	332035.243535	7234058.0179
Doispane b	2008/11/03 00:01:00	Wet	Active	333983.521703	7233975.87896
Doispane b	2008/11/03 11:01:00	Wet	Resting	329031.331325	7235197.94294
Doispane b	2008/11/03 22:01:00	Wet	Active	327947.565558	7235608.07014
Doispane b	2008/11/04 20:01:00	Wet	Active	323776.417223	7235200.9252
Doispane b	2008/11/05 16:01:00	Wet	Resting	327049.424887	7232688.23362
Doispane b	2008/11/06 14:01:00	Wet	Resting	327063.986668	7232624.86082
Doispane b	2008/11/07 01:02:00	Wet	Active	326908.736245	7235074.5723
Doispane b	2008/11/07 23:01:00	Wet	Active	325118.707278	7236141.30442
Doispane b	2008/11/08 19:02:00	Wet	Active	331754.053279	7235395.309
Doispane b	2008/11/11 00:01:00	Wet	Active	327790.361678	7231665.5778
Doispane b	2008/11/11 11:04:00	Wet	Resting	331899.726256	7235442.39905
Doispane b	2008/11/11 22:01:00	Wet	Active	334697.003037	7234504.90047
Doispane b	2008/11/12 20:01:00	Wet	Active	333920.86515	7234129.27223
Doispane b	2008/11/14 14:03:00	Wet	Resting	331785.375608	7235988.87624
Doispane b	2008/11/15 01:01:00	Wet	Active	326712.564415	7234896.51909
Doispane b	2008/11/15 23:01:00	Wet	Active	327973.612558	7234630.93435
Doispane b	2008/11/16 08:04:00	Wet	Resting	327092.361372	7234084.09968
Doispane b	2008/11/16 19:02:00	Wet	Active	325973.992758	7234405.95893
Doispane b	2008/11/19 00:02:00	Wet	Active	336009.281597	7236851.00352
Doispane b	2008/11/19 11:02:00	Wet	Resting	331762.172367	7236088.43138
Doispane b	2008/11/19 22:02:00	Wet	Active	330619.211042	7237051.78549
Doispane b	2008/11/22 14:03:00	Wet	Resting	330870.236902	7235257.30412
Doispane b	2008/11/23 01:02:00	Wet	Active	325772.557966	7235272.01101
Doispane b	2008/11/23 23:01:00	Wet	Active	327832.979261	7232879.77915
Doispane b	2008/11/24 08:02:00	Wet	Resting	328959.750498	7235172.93317
Doispane b	2008/11/24 19:01:00	Wet	Active	329349.261843	7235580.31766
Doispane b	2008/11/25 17:02:00	Wet	Resting	331163.894296	7236062.81054
Doispane b	2008/11/27 00:01:00	Wet	Active	338093.393481	7233008.291
Doispane b	2008/11/27 11:02:00	Wet	Resting	331172.109847	7236062.91186
Doispane b	2008/11/27 22:01:00	Wet	Active	332698.44462	7234628.90096
Doispane b	2008/11/28 20:01:00	Wet	Active	325159.658317	7235315.58131
Doispane b	2008/11/29 05:03:00	Wet	Active	329111.436669	7235395.69705
Doispane b	2008/11/29 16:02:00	Wet	Resting	330966.905867	7236378.1569
Doispane b	2008/12/01 01:02:00	Wet	Active	333116.201788	7235203.06712
Doispane b	2008/12/01 23:01:00	Wet	Active	336059.562327	7235414.20678
Doispane b	2008/12/02 19:01:00	Wet	Active	330046.858091	7236042.90316
Doispane b	2008/12/05 00:01:00	Wet	Active	333620.730172	7232969.69325
Doispane b	2008/12/05 11:02:00	Wet	Resting	330923.336806	7235215.5899
Doispane b	2008/12/05 22:02:00	Wet	Active	326013.165337	7232408.90975
Doispane b	2008/12/07 05:01:00	Wet	Active	330060.013656	7235876.73967
Doispane b	2008/12/09 01:02:00	Wet	Active	330197.557396	7236347.45167
Doispane b	2008/12/09 23:03:00	Wet	Active	327592.3147	7235125.57294
Doispane b	2008/12/10 08:04:00	Wet	Resting	327181.470167	7234021.66893
Doispane b	2008/12/10 19:01:00	Wet	Active	326270.183078	7234324.98066
Doispane b	2008/12/13 00:01:00	Wet	Active	333075.076294	7233607.60724
Doispane b	2008/12/13 11:01:00	Wet	Resting	331955.927966	7235800.30546
Doispane b	2008/12/13 22:01:00	Wet	Active	334117.296556	7235681.30528
Doispane b	2008/12/14 20:01:00	Wet	Active	331765.171565	7235159.25443
Doispane b	2008/12/15 16:02:00	Wet	Resting	331955.856039	7235806.16428
Doispane b	2008/12/16 14:03:00	Wet	Resting	331498.792736	7236191.11755
Doispane b	2008/12/17 01:01:00	Wet	Active	332994.49331	7233664.09337
Doispane b	2008/12/17 23:01:00	Wet	Active	326301.456827	7234903.25164
Doispane b	2008/12/18 08:02:00	Wet	Resting	331562.388255	7235063.00451
Doispane b	2008/12/18 19:02:00	Wet	Active	331003.438618	7234983.31699
Doispane b	2008/12/19 17:01:00	Wet	Resting	331588.616816	7234951.31666
Doispane b	2008/12/21 00:01:00	Wet	Active	330811.36538	7232892.84597
Doispane b	2008/12/21 11:02:00	Wet	Resting	331823.388188	7234015.97435
Doispane b	2008/12/21 22:01:00	Wet	Active	334760.012817	7235223.01462
Doispane b	2008/12/22 20:01:00	Wet	Active	331364.931121	7233402.0447
Doispane b	2008/12/25 01:01:00	Wet	Active	329463.181809	7233741.54144
Doispane b	2008/12/25 07:01:00	Wet	Resting	332274.417176	7234133.52293
Doispane b	2008/12/25 22:01:00	Wet	Active	334127.976259	7235257.73797
Doispane b	2008/12/26 08:02:00	Wet	Resting	333856.188157	7235142.4316
Doispane b	2008/12/26 13:02:00	Wet	Resting	333861.218895	7235184.86242
Doispane b	2008/12/26 23:01:00	Wet	Active	335011.125412	7235213.87449
Doispane b	2008/12/27 09:01:00	Wet	Resting	331624.848454	7234694.38588
Doispane b	2008/12/27 19:01:00	Wet	Active	330179.859804	7236002.18323
Doispane b	2008/12/29 01:03:00	Wet	Active	335186.136371	7234889.19755
Doispane b	2008/12/29 11:02:00	Wet	Resting	333723.862506	7234689.85656
Doispane b	2008/12/29 21:02:00	Wet	Active	336861.929754	7232206.66596
Doispane b	2008/12/30 22:01:00	Wet	Active	330288.73458	7235670.65478
Doispane b	2009/01/01 14:02:00	Wet	Resting	331545.684431	7234617.91121
Doispane b	2009/01/01 19:02:00	Wet	Active	331022.816006	7234977.69656
Doispane b	2009/01/02 00:01:00	Wet	Active	331401.583268	7235127.50946
Doispane b	2009/01/02 15:03:00	Wet	Resting	331883.201289	7235433.18115
Doispane b	2009/01/02 20:01:00	Wet	Active	330608.842088	7235432.56781
Doispane b	2009/01/03 01:02:00	Wet	Active	334199.948083	7235912.40993
Doispane b	2009/01/03 16:03:00	Wet	Resting	332007.74945	7235628.3059
Doispane b	2009/01/03 21:01:00	Wet	Active	331794.091256	7235513.67135
Doispane b	2009/01/04 02:04:00	Wet	Active	336602.010048	7235502.27715
Doispane b	2009/01/04 17:03:00	Wet	Resting	331640.978414	7234718.92472
Doispane b	2009/01/04 22:02:00	Wet	Active	331220.333968	7235500.52276
Doispane b	2009/01/05 18:01:00	Wet	Active	331826.938557	7235983.30184
Doispane b	2009/01/05 23:02:00	Wet	Active	329012.754785	7234465.46226
Doispane b	2009/01/07 00:01:00	Wet	Active	329754.308414	7233173.16383
Doispane b	2009/01/07 20:01:00	Wet	Active	334975.111422	7236599.68824
Doispane b	2009/01/08 01:01:00	Wet	Active	338120.324093	7231670.83087
Doispane b	2009/01/08 21:01:00	Wet	Active	326278.821281	7234291.73412
Doispane b	2009/01/09 02:01:00	Wet	Active	331710.203205	7236723.34465
Doispane b	2009/01/09 22:01:00	Wet	Active	331850.583023	7236065.17733
Doispane b	2009/01/10 23:01:00	Wet	Active	333763.156397	7235546.96965
Doispane b	2009/01/12 00:01:00	Wet	Active	330111.133826	7233976.55884
Doispane b	2009/01/13 01:02:00	Wet	Active	332785.787026	7235162.74881
Doispane b	2009/01/13 07:03:00	Wet	Resting	331785.264847	7235997.8898
Doispane b	2009/01/13 12:02:00	Wet	Resting	331992.460378	7235970.23433
Doispane b	2009/01/13 22:01:00	Wet	Active	333479.317702	7235510.16424
Doispane b	2009/01/14 03:03:00	Wet	Active	334730.546934	7232867.98948
Doispane b	2009/01/14 23:01:00	Wet	Active	334520.08376	7236124.9764
Doispane b	2009/01/15 09:04:00	Wet	Resting	332286.303394	7236079.76265
Doispane b	2009/01/15 19:02:00	Wet	Active	332085.691882	7236022.76325
Doispane b	2009/01/16 00:01:00	Wet	Active	338143.579882	7233435.50459
Doispane b	2009/01/16 05:01:00	Wet	Active	330848.860407	7235208.58442
Doispane b	2009/01/16 10:03:00	Wet	Resting	330959.745894	7235161.49912
Doispane b	2009/01/16 20:01:00	Wet	Active	331199.103118	7235439.86071
Doispane b	2009/01/17 01:04:00	Wet	Active	337017.292213	7236524.08585
Doispane b	2009/01/17 21:04:00	Wet	Active	330834.587472	7235698.59717
Doispane b	2009/01/18 22:01:00	Wet	Active	328388.720883	7232765.73832
Doispane b	2009/01/19 08:04:00	Wet	Resting	331918.110382	7235969.32161
Doispane b	2009/01/19 13:04:00	Wet	Resting	332016.091168	7235852.42895
Doispane b	2009/01/19 18:04:00	Wet	Active	331979.518171	7235903.3651
Doispane b	2009/01/20 09:01:00	Wet	Resting	330613.4384	7234845.52366
Doispane b	2009/01/20 19:02:00	Wet	Active	331156.664635	7235300.05609
Doispane b	2009/01/21 00:02:00	Wet	Active	334329.871356	7234987.71071
Doispane b	2009/01/21 15:04:00	Wet	Resting	331106.476642	7235338.87726
Doispane b	2009/01/21 20:01:00	Wet	Active	331115.27255	7235308.56031
Doispane b	2009/01/22 01:01:00	Wet	Active	330434.787623	7235902.57249
Doispane b	2009/01/22 16:03:00	Wet	Resting	331163.405271	7235203.22843
Doispane b	2009/01/22 21:02:00	Wet	Active	331235.605817	7235394.78536
Doispane b	2009/01/23 02:04:00	Wet	Active	332666.62717	7236559.50096
Doispane b	2009/01/23 12:02:00	Wet	Resting	331173.170917	7235527.21131
Doispane b	2009/01/23 17:02:00	Wet	Resting	331151.120116	7235533.02438
Doispane b	2009/01/23 22:01:00	Wet	Active	330945.038594	7236801.58981
Doispane b	2009/01/24 13:01:00	Wet	Resting	331106.626813	7235326.70891
Doispane b	2009/01/24 18:01:00	Wet	Active	331133.493653	7235396.68103
Doispane b	2009/01/24 23:01:00	Wet	Active	333484.361017	7233509.60189
Doispane b	2009/01/25 14:02:00	Wet	Resting	331295.481435	7235453.21927
Doispane b	2009/01/26 00:01:00	Wet	Active	329747.989506	7236123.93062
Doispane b	2009/01/26 15:04:00	Wet	Resting	331332.280988	7235384.03234
Doispane b	2009/01/26 20:01:00	Wet	Active	331155.133712	7235657.25493
Doispane b	2009/01/27 01:02:00	Wet	Active	332993.760748	7233034.61906
Doispane b	2009/01/27 16:02:00	Wet	Resting	331178.602236	7235536.51863
Doispane b	2009/01/28 02:01:00	Wet	Active	329639.027173	7234019.14264
Doispane b	2009/01/28 17:02:00	Wet	Resting	331314.078887	7235510.91882
Doispane b	2009/01/28 22:01:00	Wet	Active	334690.909763	7234771.21444
Doispane b	2009/01/29 23:01:00	Wet	Active	335207.865445	7236735.45922
Doispane b	2009/01/30 19:01:00	Wet	Active	331444.873065	7235648.65589
Doispane b	2009/01/31 00:02:00	Wet	Active	333611.508602	7235315.0229
Doispane b	2009/02/01 01:04:00	Wet	Active	331315.332448	7235625.87488
Doispane b	2009/02/01 21:02:00	Wet	Active	328500.160345	7234655.57497
Doispane b	2009/02/03 23:03:00	Wet	Active	330698.2103	7235796.75185
Doispane b	2009/02/05 00:01:00	Wet	Active	326353.59597	7234922.16917
Doispane b	2009/02/06 01:02:00	Wet	Active	331764.437356	7235452.90684
Doispane b	2009/02/06 07:02:00	Wet	Resting	330737.620274	7235948.69078
Doispane b	2009/02/06 22:01:00	Wet	Active	330824.218651	7236088.81716
Doispane b	2009/02/07 03:02:00	Wet	Active	333842.404297	7234924.33043
Doispane b	2009/02/07 13:03:00	Wet	Resting	331253.119373	7235540.36745
Doispane b	2009/02/07 18:02:00	Wet	Active	331178.602236	7235536.51863
Doispane b	2009/02/07 23:03:00	Wet	Active	326656.959676	7235134.9422
Doispane b	2009/02/09 20:01:00	Wet	Active	331284.802068	7235419.7323
Doispane b	2009/02/10 06:02:00	Wet	Active	331252.299786	7235606.84262
Doispane b	2009/02/10 21:01:00	Wet	Active	331270.969546	7235658.68338
Doispane b	2009/02/11 02:01:00	Wet	Active	331151.156255	7235530.09497
Doispane b	2009/02/11 12:01:00	Wet	Resting	330769.376834	7234726.2017
Doispane b	2009/02/11 22:02:00	Wet	Active	331151.231315	7235524.0108
Doispane b	2009/02/12 08:01:00	Wet	Resting	330234.819124	7236456.99512
Doispane b	2009/02/12 13:02:00	Wet	Resting	330939.706061	7235669.6958
Doispane b	2009/02/12 18:01:00	Wet	Active	330808.426933	7235804.19973
Doispane b	2009/02/12 23:01:00	Wet	Active	332856.864567	7235448.03671
Doispane b	2009/02/13 14:01:00	Wet	Resting	330736.79748	7234686.5835
Doispane b	2009/02/13 19:01:00	Wet	Active	331454.764422	7235512.65205
Doispane b	2009/02/14 20:01:00	Wet	Active	331565.985424	7235438.29577
Doispane b	2009/02/15 01:02:00	Wet	Active	331423.227553	7235388.08276
Doispane b	2009/02/15 11:03:00	Wet	Resting	331177.201596	7235200.46877
Doispane b	2009/02/15 16:03:00	Wet	Resting	330719.730286	7235385.48431
Doispane b	2009/02/17 13:04:00	Wet	Resting	331437.152782	7236042.06301
Doispane b	2009/02/17 18:02:00	Wet	Active	331437.152782	7236042.06301
Doispane b	2009/02/19 00:01:00	Wet	Active	331076.903382	7235504.83832
Doispane b	2009/02/19 20:01:00	Wet	Active	331074.30853	7235498.7212
Doispane b	2009/02/21 02:01:00	Wet	Active	334146.07164	7235357.79648
Doispane b	2009/02/22 18:02:00	Wet	Active	330725.275519	7235385.55289
Doispane b	2009/02/22 23:01:00	Wet	Active	333184.916199	7234099.13188
Doispane b	2009/02/24 00:01:00	Wet	Active	332955.83941	7235467.50022
Doispane b	2009/02/24 20:01:00	Wet	Active	331131.664178	7235544.95454
Doispane b	2009/02/25 01:01:00	Wet	Active	335238.889407	7233016.5591
Doispane b	2009/02/26 02:01:00	Wet	Active	330302.775032	7234753.77794
Doispane b	2009/02/26 22:01:00	Wet	Active	329342.599222	7232574.83976
Doispane b	2009/02/27 23:01:00	Wet	Active	333815.344279	7233516.78332
Doispane b	2009/03/01 00:01:00	Wet	Active	331188.312814	7235415.38724
Doispane b	2009/03/02 01:01:00	Wet	Active	331724.785482	7234184.24267
Doispane b	2009/03/02 17:01:00	Wet	Resting	331247.276803	7235564.41041
Doispane b	2009/03/02 22:01:00	Wet	Active	331217.228984	7234187.00437
Doispane b	2009/03/03 03:01:00	Wet	Active	329665.038451	7234140.49353
Doispane b	2009/03/03 18:02:00	Wet	Active	331754.942303	7235991.43208
Doispane b	2009/03/03 23:01:00	Wet	Active	333566.064882	7235420.3948
Doispane b	2009/03/04 04:02:00	Wet	Active	331194.305537	7235379.17595
Doispane b	2009/03/04 09:02:00	Wet	Resting	331235.850013	7235591.53975
Doispane b	2009/03/04 19:01:00	Wet	Active	331203.492231	7235533.67039
Doispane b	2009/03/05 00:03:00	Wet	Active	335601.677628	7233810.62107
Doispane b	2009/03/05 05:01:00	Wet	Active	332580.833302	7234336.95694
Doispane b	2009/03/05 15:02:00	Wet	Resting	331401.498624	7235584.56631
Doispane b	2009/03/06 01:02:00	Wet	Active	331290.272301	7235425.88483
Doispane b	2009/03/06 06:02:00	Wet	Active	333903.918439	7234628.48897
Doispane b	2009/03/06 21:01:00	Wet	Active	328296.239716	7233539.42638
Doispane b	2009/03/07 07:01:00	Wet	Resting	330415.522651	7232337.12362
Doispane b	2009/03/07 17:02:00	Wet	Resting	330749.789544	7232740.6317
Doispane b	2009/03/08 08:04:00	Wet	Resting	331250.335908	7235316.3115
Doispane b	2009/03/08 13:02:00	Wet	Resting	331291.877912	7235295.63854
Doispane b	2009/03/08 23:01:00	Wet	Active	336426.007953	7233369.76776
Doispane b	2009/03/09 14:03:00	Wet	Resting	331252.930795	7235322.4286
Doispane b	2009/03/10 00:01:00	Wet	Active	331831.493161	7234476.06141
Doispane b	2009/03/10 10:03:00	Wet	Resting	331939.865445	7235987.61855
Doispane b	2009/03/10 20:01:00	Wet	Active	331511.807687	7234917.01578
Doispane b	2009/03/11 11:04:00	Wet	Resting	331255.956121	7235310.29571
Doispane b	2009/03/11 21:01:00	Wet	Active	335945.80107	7233630.17594
Doispane b	2009/03/12 12:02:00	Wet	Resting	333199.017285	7235655.0455
Doispane b	2009/03/12 17:01:00	Wet	Resting	331175.971199	7235533.33094
Doispane b	2009/03/13 13:02:00	Wet	Resting	331353.734447	7235426.66699
Doispane b	2009/03/13 23:03:00	Wet	Active	327850.185183	7231953.91496
Doispane b	2009/03/14 19:02:00	Wet	Active	331849.220683	7235741.29952
Doispane b	2009/03/15 20:01:00	Wet	Active	331079.795824	7235486.8441
Doispane b	2009/03/16 01:02:00	Wet	Active	337762.914259	7236684.38723
Doispane b	2009/03/16 21:01:00	Wet	Active	325275.663755	7234660.30285
Doispane b	2009/03/17 02:01:00	Wet	Active	331170.462052	7235530.33313
Doispane b	2009/03/17 22:01:00	Wet	Active	331145.238445	7235560.22207
Doispane b	2009/03/18 18:02:00	Wet	Active	330686.071482	7235881.34248
Doispane b	2009/03/18 23:03:00	Wet	Active	334346.850637	7232890.61562
Doispane b	2009/03/21 01:01:00	Wet	Active	331423.260859	7232252.67825
Doispane b	2009/03/21 21:02:00	Wet	Active	333922.296224	7236296.2309
Doispane b	2009/03/22 22:01:00	Wet	Active	330835.736239	7233147.37058
Doispane b	2009/03/23 23:03:00	Wet	Active	331360.422496	7235550.70495
Doispane b	2009/03/26 01:02:00	Wet	Active	331989.368214	7235770.29061
Doispane b	2009/03/26 22:02:00	Wet	Active	337553.601461	7233413.40903
Doispane b	2009/03/27 03:01:00	Wet	Active	331855.088225	7234812.38318
Doispane b	2009/03/27 08:02:00	Wet	Resting	331915.828046	7235251.93115
Doispane b	2009/03/27 18:03:00	Wet	Active	332105.873733	7235499.46977
Doispane b	2009/03/27 23:02:00	Wet	Active	331623.988211	7235214.98826
Doispane b	2009/03/28 04:01:00	Wet	Active	333516.321272	7234747.95763
Doispane b	2009/03/28 09:03:00	Wet	Resting	334434.465113	7234780.28365
Doispane b	2009/03/28 14:04:00	Wet	Resting	334328.865111	7234833.3197
Doispane b	2009/03/28 19:01:00	Wet	Active	333485.359717	7235249.93384
Doispane b	2009/03/28 20:01:00	Wet	Active	331278.734573	7235462.02778
Doispane b	2009/03/29 05:01:00	Wet	Active	333909.635577	7234834.32216
Doispane b	2009/03/31 01:01:00	Wet	Active	329256.509525	7231953.30169
Doispane b	2009/03/31 23:01:00	Wet	Active	329288.105755	7231857.00961
Doispane b	2009/04/02 17:03:00	Dry	Active	331331.572817	7235441.49393
Doispane b	2009/04/03 13:03:00	Dry	Resting	333950.189197	7234674.57559
Doispane b	2009/04/04 00:01:00	Dry	Active	331219.883793	7235537.02777
Doispane b	2009/04/04 11:02:00	Dry	Resting	327070.515655	7232758.14268
Doispane b	2009/04/04 22:01:00	Dry	Active	325331.437952	7232448.67249
Doispane b	2009/04/05 20:01:00	Dry	Active	331009.187406	7234950.25797
Doispane b	2009/04/06 03:02:00	Dry	Active	331256.536681	7235479.78402
Doispane b	2009/04/07 23:04:00	Dry	Active	336665.465354	7235951.0656
Doispane b	2009/04/08 21:01:00	Dry	Active	331141.111049	7235445.23042
Doispane b	2009/04/09 17:02:00	Dry	Active	329766.733955	7234617.07722
Doispane b	2009/04/12 09:02:00	Dry	Resting	330890.376422	7235638.88627
Doispane b	2009/04/12 20:02:00	Dry	Active	331141.074905	7235448.15984
Doispane b	2009/04/13 18:03:00	Dry	Active	331151.04438	7235306.07185
Doispane b	2009/04/14 03:02:00	Dry	Active	329076.43186	7233791.25466
Doispane b	2009/04/14 14:02:00	Dry	Resting	330293.542326	7234620.4667
Doispane b	2009/04/15 12:03:00	Dry	Resting	331158.569673	7235378.73512
Doispane b	2009/04/15 23:01:00	Dry	Active	337125.974164	7232727.26031
Doispane b	2009/04/20 09:02:00	Dry	Resting	330292.077695	7234738.54513
Doispane b	2009/04/20 20:01:00	Dry	Active	330945.378412	7236108.5692
Doispane b	2009/04/21 18:02:00	Dry	Active	327357.187447	7234078.42957
Doispane b	2009/04/22 03:01:00	Dry	Active	328713.309932	7233266.09017
Doispane b	2009/04/22 14:02:00	Dry	Resting	331292.73928	7235459.04519
Doispane b	2009/04/23 12:02:00	Dry	Resting	327826.214738	7232976.60673
Doispane b	2009/04/23 23:02:00	Dry	Active	334169.952779	7235200.77719
Doispane b	2009/04/24 21:02:00	Dry	Active	335558.55701	7235108.45522
Doispane b	2009/04/25 06:01:00	Dry	Active	331555.656192	7234708.8596
Doispane b	2009/04/25 17:01:00	Dry	Active	331589.710725	7235296.37706
Doispane b	2009/04/27 22:01:00	Dry	Active	334643.880888	7232969.93596
Doispane b	2009/04/28 09:02:00	Dry	Resting	332215.402661	7235797.40344
Doispane b	2009/04/28 20:01:00	Dry	Active	335662.275488	7233587.55753
Doispane b	2009/04/29 18:02:00	Dry	Active	333924.794201	7233805.6868
Doispane b	2009/04/30 03:01:00	Dry	Active	331259.57891	7235449.62143
Doispane b	2009/05/03 06:01:00	Dry	Active	331936.284642	7235158.42716
Doispane b	2009/05/03 17:02:00	Dry	Active	328484.926615	7235215.44631
Doispane b	2009/05/04 15:02:00	Dry	Resting	331891.982392	7235169.82777
Doispane b	2009/05/05 11:02:00	Dry	Resting	332003.144741	7236003.49526
Doispane b	2009/05/05 22:01:00	Dry	Active	331171.396031	7235454.619
Doispane b	2009/05/06 20:01:00	Dry	Active	334736.382518	7232843.94536
Doispane b	2009/05/08 03:02:00	Dry	Active	327367.800819	7232359.3727
Doispane b	2009/05/08 14:02:00	Dry	Resting	328867.762293	7234381.83749
Doispane b	2009/05/09 12:01:00	Dry	Resting	331508.418679	7234508.37139
Doispane b	2009/05/09 23:01:00	Dry	Active	331883.253031	7232070.60725
Doispane b	2009/05/10 21:01:00	Dry	Active	331256.870079	7235452.74327
Doispane b	2009/05/13 22:01:00	Dry	Active	327146.126371	7232674.35624
Doispane b	2009/05/14 09:02:00	Dry	Resting	331516.130999	7234565.9367
Doispane b	2009/05/14 20:01:00	Dry	Active	336348.095941	7232981.42658
Doispane b	2009/05/15 18:02:00	Dry	Active	327054.27875	7235130.72879
Doispane b	2009/05/16 03:01:00	Dry	Active	331747.097949	7235961.13567
Doispane b	2009/05/16 14:04:00	Dry	Resting	331777.160121	7235988.77528
Doispane b	2009/05/17 12:02:00	Dry	Resting	330973.506049	7235161.66908
Doispane b	2009/05/17 23:03:00	Dry	Active	325890.105898	7233412.09043
Doispane b	2009/05/18 21:01:00	Dry	Active	335200.323583	7233012.93912
Doispane b	2009/05/19 06:02:00	Dry	Active	330293.034105	7236218.59426
Doispane b	2009/05/21 11:01:00	Dry	Resting	331414.43508	7235418.17452
Doispane b	2009/05/21 22:03:00	Dry	Active	330530.159973	7234653.8253
Doispane b	2009/05/22 09:04:00	Dry	Resting	332023.825416	7235891.73874
Doispane b	2009/05/22 20:02:00	Dry	Active	331343.767101	7235568.75499
Doispane b	2009/05/23 18:01:00	Dry	Active	333677.698294	7236223.84735
Doispane b	2009/05/24 14:02:00	Dry	Resting	326699.286054	7233107.51358
Doispane b	2009/05/25 23:01:00	Dry	Active	334244.550368	7233824.66569
Doispane b	2009/06/04 06:01:00	Dry	Active	332102.722807	7235538.646
Doispane b	2009/06/04 17:01:00	Dry	Active	332213.697732	7236154.37276
Doispane b	2009/06/07 20:01:00	Dry	Active	335666.498712	7235082.48228
Doispane b	2009/06/08 18:01:00	Dry	Active	331181.365189	7235312.53101
Doispane b	2009/06/09 03:01:00	Dry	Active	331744.081394	7235755.33288
Doispane b	2009/06/10 23:02:00	Dry	Active	332284.215325	7236921.05218
Doispane b	2009/06/11 21:01:00	Dry	Active	335629.209715	7234271.15618
Doispane b	2009/06/12 06:01:00	Dry	Active	331827.516358	7235250.84618
Doispane b	2009/06/12 17:02:00	Dry	Active	332656.244709	7234922.04517
Doispane b	2009/06/13 15:03:00	Dry	Resting	335292.458734	7234076.44288
Doispane b	2009/06/15 20:01:00	Dry	Active	332285.912831	7235441.05193
Doispane b	2009/06/17 03:01:00	Dry	Active	335377.240278	7235735.95674
Doispane b	2009/06/18 23:01:00	Dry	Active	327883.968936	7232989.50434
Doispane b	2009/06/19 21:02:00	Dry	Active	332284.289838	7236914.96804
Doispane b	2009/06/20 06:01:00	Dry	Active	331537.372239	7234408.88735
Doispane b	2009/06/21 15:01:00	Dry	Resting	331627.901809	7234446.28703
Doispane b	2009/06/22 11:03:00	Dry	Resting	331578.743247	7235069.29091
Doispane b	2009/06/23 09:02:00	Dry	Resting	332022.984567	7235056.49618
Doispane b	2009/06/23 20:01:00	Dry	Active	326839.311336	7235334.00674
Doispane b	2009/06/26 12:03:00	Dry	Resting	331917.128893	7235146.02173
Doispane b	2009/07/12 23:01:00	Dry	Active	331959.74846	7235037.46455
Doispane b	2009/07/18 18:01:00	Dry	Active	331886.518384	7235614.64725
Doispane b	2009/07/21 21:01:00	Dry	Active	332095.074606	7234588.37956
Doispane b	2009/07/24 11:03:00	Dry	Resting	331102.930621	7235193.46722
Doispane b	2009/07/24 22:01:00	Dry	Active	331861.36266	7235187.70682
Doispane b	2009/07/25 20:02:00	Dry	Active	334265.342951	7235295.68693
Doispane b	2009/07/28 23:01:00	Dry	Active	330715.665026	7236611.24491
Doispane b	2009/07/30 06:02:00	Dry	Active	331908.877934	7235148.85024
Doispane b	2009/08/01 22:01:00	Dry	Active	331896.361789	7236619.70607
Doispane b	2009/08/04 03:01:00	Dry	Active	331894.857639	7235169.86309
Doispane b	2009/08/04 14:02:00	Dry	Resting	331743.382104	7235143.88652
Doispane b	2009/08/05 12:03:00	Dry	Resting	331575.926395	7235081.20104
Doispane b	2009/08/05 23:01:00	Dry	Active	331809.809037	7235120.58817
Doispane b	2009/08/06 21:03:00	Dry	Active	331957.804308	7236768.75549
Doispane b	2009/08/07 06:04:00	Dry	Active	331745.827552	7235162.17183
Doispane b	2009/08/08 15:01:00	Dry	Resting	331732.366693	7235137.66599
Doispane b	2009/08/09 11:01:00	Dry	Resting	331185.829116	7235400.25655
Doispane b	2009/08/11 18:01:00	Dry	Active	332257.118691	7232396.13307
Doispane b	2009/08/12 03:01:00	Dry	Active	331246.602032	7235385.90599
Doispane b	2009/08/12 14:02:00	Dry	Resting	331367.680875	7235411.7388
Doispane b	2009/08/13 23:01:00	Dry	Active	331437.005724	7236054.00599
Doispane b	2009/08/23 06:01:00	Dry	Active	330680.25758	7235454.63673
Doispane b	2009/08/25 11:03:00	Dry	Resting	330610.668765	7235517.33126
Doispane b	2009/08/29 23:01:00	Dry	Active	335381.634924	7234909.58056
Doispane b	2009/08/30 21:01:00	Dry	Active	330528.661387	7232338.52684
Doispane b	2009/08/31 17:01:00	Dry	Active	330456.523623	7235491.08216
Doispane b	2009/09/02 11:03:00	Dry	Resting	330610.70781	7235514.1765
Doispane b	2009/09/02 22:01:00	Dry	Active	332137.656721	7236056.75571
Doispane b	2009/09/03 09:01:00	Dry	Resting	331332.84198	7235338.51375
Doispane b	2009/09/05 03:02:00	Dry	Active	334129.546539	7236026.49596
Doispane b	2009/09/05 14:01:00	Dry	Resting	330613.377763	7235514.20954
Doispane b	2009/09/07 21:02:00	Dry	Active	332243.517389	7235967.22824
Doispane b	2009/09/08 06:04:00	Dry	Active	331381.59118	7235399.74001
Doispane b	2009/09/10 11:03:00	Dry	Resting	330607.832475	7235514.14091
Doispane b	2009/09/10 22:01:00	Dry	Active	333626.59044	7236795.21761
Doispane b	2009/09/11 20:02:00	Dry	Active	333514.425727	7236491.18119
Doispane b	2009/09/12 18:01:00	Dry	Active	330552.901945	7235504.44596
Doispane b	2009/09/13 14:02:00	Dry	Resting	330968.116215	7234716.71358
Doispane b	2009/09/14 12:02:00	Dry	Resting	330301.995726	7234369.50356
Doispane b	2009/09/14 23:01:00	Dry	Active	329001.135285	7235839.21232
Doispane b	2009/09/15 21:02:00	Dry	Active	332868.138486	7234525.05002
Doispane b	2009/09/16 06:01:00	Dry	Active	330561.481784	7234811.52489
Doispane b	2009/09/17 15:02:00	Dry	Resting	330839.197112	7235774.37989
Doispane b	2009/09/18 22:03:00	Dry	Active	333444.206278	7234547.17533
Doispane b	2009/09/19 09:02:00	Dry	Resting	333544.301632	7234490.92381
Doispane b	2009/09/20 18:01:00	Dry	Active	330555.345922	7235522.73157
Doispane b	2009/09/21 14:01:00	Dry	Resting	330722.641826	7235382.59045
Doispane b	2009/09/22 12:03:00	Dry	Resting	330717.096593	7235382.52186
Doispane b	2009/09/22 23:01:00	Dry	Active	333407.957066	7234589.10384
Doispane b	2009/09/23 21:01:00	Dry	Active	330696.428752	7234828.29545
Doispane b	2009/09/24 06:03:00	Dry	Active	331017.212018	7235431.53099
Doispane b	2009/09/24 17:01:00	Dry	Active	331170.499976	7235294.14168
Doispane b	2009/09/25 15:01:00	Dry	Resting	328353.656052	7234021.32848
Doispane b	2009/09/26 11:02:00	Dry	Resting	330304.795352	7234375.62342
Doispane b	2009/09/26 22:01:00	Dry	Active	330609.469559	7235614.22748
Doispane b	2009/09/28 18:02:00	Dry	Active	331223.470504	7235479.37629
Doispane b	2009/09/29 03:02:00	Dry	Active	331952.217794	7235885.00014
Doispane b	2009/09/29 14:01:00	Dry	Resting	334109.83499	7234246.7299
Doispane b	2009/09/30 12:02:00	Dry	Resting	330970.177893	7235663.98705
Doispane b	2009/09/30 23:01:00	Dry	Active	331217.997496	7235473.44908
Doispane b	2009/10/01 21:02:00	Wet	Active	331220.595184	7235479.34083
Doispane b	2009/10/02 17:01:00	Wet	Active	329898.966005	7236174.26305
Doispane b	2009/10/03 15:01:00	Wet	Resting	327930.996863	7233201.95193
Doispane b	2009/10/04 11:01:00	Wet	Resting	330396.066286	7234137.63223
Doispane b	2009/10/04 22:01:00	Wet	Active	330676.689957	7235527.16318
Doispane b	2009/10/05 09:03:00	Wet	Resting	330994.140932	7234838.0611
Doispane b	2009/10/05 20:01:00	Wet	Active	330504.138009	7234980.29655
Doispane b	2009/10/08 23:01:00	Wet	Active	330720.254293	7235343.12038
Doispane b	2009/10/09 21:01:00	Wet	Active	331392.546464	7235194.10876
Doispane b	2009/10/14 18:02:00	Wet	Active	330719.805542	7235379.40012
Doispane b	2009/10/15 03:02:00	Wet	Active	330719.76652	7235382.55488
Doispane b	2009/10/15 14:02:00	Wet	Resting	330717.096593	7235382.52186
Doispane b	2009/10/16 23:01:00	Wet	Active	330839.875415	7235486.81069
Doispane b	2009/10/17 21:01:00	Wet	Active	331431.086651	7236768.36671
Doispane b	2009/10/18 06:04:00	Wet	Active	330623.56409	7234691.26729
Doispane b	2009/10/18 17:01:00	Wet	Active	330719.694052	7235388.41373
Doispane b	2009/10/20 11:02:00	Wet	Resting	331056.906634	7235111.31366
Doispane b	2009/10/20 22:01:00	Wet	Active	330676.62209	7235300.2102
Doispane b	2009/10/23 14:01:00	Wet	Resting	330728.30133	7235373.4201
Doispane b	2009/10/24 12:03:00	Wet	Resting	330719.730286	7235385.48431
Doispane b	2009/10/24 23:01:00	Wet	Active	332265.049674	7235567.90644
Doispane b	2009/10/28 11:01:00	Wet	Resting	328359.277136	7234015.31382
Doispane b	2009/11/03 06:02:00	Wet	Active	328602.407008	7234200.01668
Doispane b	2009/11/04 15:01:00	Wet	Resting	328583.331611	7234181.52209
Doispane b	2009/11/09 23:01:00	Wet	Active	330571.571742	7235556.06251
Doispane b	2009/11/10 21:01:00	Wet	Active	330720.111274	7235803.10782
Doispane b	2009/11/13 11:02:00	Wet	Resting	328763.484932	7234114.13695
Doispane b	2009/11/13 22:01:00	Wet	Active	331357.598386	7235329.80389
Doispane b	2009/11/14 09:03:00	Wet	Resting	330307.902889	7234572.18916
Doispane b	2009/11/14 20:02:00	Wet	Active	331872.289075	7236555.85537
Doispane b	2009/11/15 18:01:00	Wet	Active	330353.666834	7235105.54335
Doispane b	2009/11/16 14:01:00	Wet	Resting	328609.592173	7234511.80338
Doispane b	2009/11/18 21:02:00	Wet	Active	335533.166124	7234469.67903
Doispane b	2009/11/20 15:03:00	Wet	Resting	328679.623504	7234200.98397
Doispane b	2009/11/22 09:01:00	Wet	Resting	333779.856584	7233716.03119
Doispane b	2009/11/22 20:01:00	Wet	Active	331173.579524	7235494.08638
Doispane b	2009/11/23 18:01:00	Wet	Active	331016.613828	7235479.97904
Doispane b	2009/11/24 03:01:00	Wet	Active	329458.011553	7234601.0621
Doispane b	2009/11/24 14:02:00	Wet	Resting	329520.378107	7234689.51067
Doispane b	2009/11/25 12:03:00	Wet	Resting	331370.892138	7235384.50815
Doispane b	2009/11/25 23:03:00	Wet	Active	326050.053484	7234061.86915
Doispane b	2009/11/27 06:02:00	Wet	Resting	328564.452635	7234589.89446
Doispane b	2009/11/27 17:01:00	Wet	Resting	328679.792855	7234400.67024
Doispane b	2009/11/28 15:01:00	Wet	Resting	329378.446227	7234557.69933
Doispane b	2009/11/29 11:03:00	Wet	Resting	328461.417584	7234010.50996
Doispane b	2009/11/30 09:01:00	Wet	Resting	328464.010966	7234016.62768
Doispane b	2009/12/02 03:01:00	Wet	Active	327582.784023	7233469.82302
Doispane b	2009/12/02 14:02:00	Wet	Resting	328018.193978	7234156.39825
Doispane b	2009/12/03 12:02:00	Wet	Resting	328031.263889	7233999.02338
Doispane b	2009/12/04 21:01:00	Wet	Active	329774.426629	7234444.53506
Doispane b	2009/12/09 18:01:00	Wet	Active	330351.530712	7235940.75612
Doispane b	2009/12/11 12:03:00	Wet	Resting	332650.325736	7234734.23753
Doispane b	2009/12/11 23:01:00	Wet	Active	330761.15974	7233597.42312
Doispane b	2009/12/14 15:02:00	Wet	Resting	333165.280025	7234126.16241
Doispane b	2009/12/15 11:03:00	Wet	Resting	332656.429354	7234906.94748
Doispane b	2009/12/15 22:02:00	Wet	Active	331889.758209	7235133.51536
Doispane b	2009/12/16 20:01:00	Wet	Active	331836.941947	7235169.15151
Doispane b	2009/12/17 18:01:00	Wet	Active	329468.088862	7232903.42737
Doispane b	2009/12/20 21:03:00	Wet	Active	331916.979432	7235158.19005
Doispane b	2009/12/23 22:01:00	Wet	Active	328987.844248	7232712.61942
Doispane b	2009/12/24 20:02:00	Wet	Active	331525.19578	7234947.38071
Doispane b	2009/12/25 18:01:00	Wet	Active	331878.970199	7235560.23962
Doispane b	2009/12/26 14:03:00	Wet	Resting	330812.25779	7234829.72819
Doispane b	2009/12/27 12:02:00	Wet	Resting	330325.793919	7234454.53983
Doispane b	2009/12/27 23:01:00	Wet	Active	332840.636275	7235414.48344
Doispane b	2009/12/28 21:01:00	Wet	Active	331206.157659	7234867.94852
Doispane b	2009/12/29 17:02:00	Wet	Resting	330185.69685	7233744.44646
Doispane b	2009/12/30 15:02:00	Wet	Resting	330968.842908	7234874.03387
Doispane b	2010/01/01 09:03:00	Wet	Resting	330892.655056	7234573.56979
Doispane b	2010/01/01 20:02:00	Wet	Active	334205.674703	7235219.23967
Doispane b	2010/01/03 14:01:00	Wet	Resting	330907.576033	7234479.77304
Doispane b	2010/01/04 23:01:00	Wet	Active	331749.810131	7235289.33137
Doispane b	2010/01/05 21:03:00	Wet	Active	331273.720828	7232738.09313
Doispane b	2010/01/07 15:02:00	Wet	Resting	331022.072459	7234805.05068
Doispane b	2010/01/08 22:02:00	Wet	Active	330794.337963	7234717.49543
Doispane b	2010/01/09 20:01:00	Wet	Active	330871.831034	7234912.27562
Doispane b	2010/01/15 15:01:00	Wet	Resting	331166.186363	7235194.24778
Doispane b	2010/01/16 22:02:00	Wet	Active	330309.571802	7235994.77675
Doispane b	2010/01/17 20:01:00	Wet	Active	330974.928359	7235046.5204
Doispane b	2010/01/24 22:01:00	Wet	Active	331311.307928	7234835.88992
Doispane b	2010/01/25 20:02:00	Wet	Active	334171.311003	7233275.90071
Doispane b	2010/01/27 03:04:00	Wet	Active	333139.050405	7233330.05318
Doispane b	2010/01/28 23:01:00	Wet	Active	332035.794747	7235368.34434
Doispane b	2010/01/29 21:01:00	Wet	Active	331881.448602	7235124.39835
Doispane b	2010/02/01 22:01:00	Wet	Active	331054.553124	7235301.95114
Doispane b	2010/02/02 20:01:00	Wet	Active	331146.917186	7235191.08017
Doispane b	2010/02/04 03:01:00	Wet	Active	331138.032044	7235245.28568
Doispane b	2010/02/04 14:01:00	Wet	Resting	331332.728114	7235347.75267
Doispane b	2010/02/05 23:01:00	Wet	Active	332860.644042	7233995.33338
Doispane b	2010/02/06 21:03:00	Wet	Active	331132.4118	7235251.30143
Doispane b	2010/02/10 09:02:00	Wet	Resting	333728.90183	7234275.23454
Doispane b	2010/02/10 20:01:00	Wet	Active	331104.704997	7235266.05957
Doispane b	2010/02/12 03:01:00	Wet	Active	333240.525517	7234069.6101
Doispane b	2010/02/12 14:01:00	Wet	Resting	333226.302972	7234090.62167
Doispane b	2010/02/13 23:01:00	Wet	Active	331220.905892	7234571.53813
Doispane b	2010/02/14 21:01:00	Wet	Active	330016.455595	7234934.80628
Doispane b	2010/02/17 22:02:00	Wet	Active	329541.933164	7235383.03561
Doispane b	2010/02/18 20:01:00	Wet	Active	329618.181462	7234587.95753
Doispane b	2010/02/20 03:01:00	Wet	Active	331264.316204	7235065.41734
Doispane b	2010/02/25 22:02:00	Wet	Active	332654.58904	7233932.41401
Doispane b	2010/02/26 20:01:00	Wet	Active	331378.746131	7234963.83204
Doispane b	2010/02/28 03:01:00	Wet	Active	335741.200043	7233685.18918
Doispane b	2010/03/01 23:01:00	Wet	Active	334561.637577	7235202.36285
Doispane b	2010/03/02 21:01:00	Wet	Active	331134.112094	7234231.50417
Doispane b	2010/03/05 22:01:00	Wet	Active	331140.456881	7235281.82619
Doispane b	2010/03/06 20:01:00	Wet	Active	329411.328474	7235248.21107
Skukuza	2007/08/20 23:03:00	Dry	Active	356467.425309	7233022.88362
Skukuza	2007/08/22 02:04:00	Dry	Active	356734.200845	7234941.13505
Skukuza	2007/08/23 14:01:00	Dry	Resting	356378.661007	7235179.43081
Skukuza	2007/08/24 02:01:00	Dry	Active	356804.253306	7235096.23113
Skukuza	2007/08/26 02:02:00	Dry	Active	356700.124239	7235567.24317
Skukuza	2007/08/26 14:03:00	Dry	Resting	356588.772934	7235139.26921
Skukuza	2007/08/27 02:01:00	Dry	Active	356787.388643	7234863.04572
Skukuza	2007/08/27 14:03:00	Dry	Resting	356588.803634	7235136.34002
Skukuza	2007/08/28 02:01:00	Dry	Active	356085.509765	7234737.59866
Skukuza	2007/08/29 02:01:00	Dry	Active	356813.70302	7234978.24815
Skukuza	2007/08/31 02:03:00	Dry	Active	356097.006259	7235206.66831
Skukuza	2007/09/01 02:02:00	Dry	Active	355680.027412	7236049.81072
Skukuza	2007/09/02 02:02:00	Dry	Active	356882.479818	7235000.15034
Skukuza	2007/09/03 02:02:00	Dry	Active	357344.051018	7233848.94177
Skukuza	2007/09/04 02:01:00	Dry	Active	356896.174808	7235006.37795
Skukuza	2007/09/05 02:03:00	Dry	Active	357139.976708	7235692.85276
Skukuza	2007/09/07 02:01:00	Dry	Active	356931.480107	7235067.14014
Skukuza	2007/09/08 02:01:00	Dry	Active	356901.813587	7234997.42304
Skukuza	2007/09/09 02:02:00	Dry	Active	356729.55281	7235640.113
Skukuza	2007/09/10 02:01:00	Dry	Active	357547.183649	7232879.81429
Skukuza	2007/09/10 14:03:00	Dry	Resting	356858.765191	7235166.43371
Skukuza	2007/09/11 02:03:00	Dry	Active	356741.298435	7235322.49667
Skukuza	2007/09/12 02:01:00	Dry	Active	356442.725019	7233028.48333
Skukuza	2007/09/12 14:02:00	Dry	Resting	356855.859578	7235169.33283
Skukuza	2007/09/13 02:01:00	Dry	Active	356904.688522	7234997.45311
Skukuza	2007/09/15 02:02:00	Dry	Active	356773.061706	7234917.20441
Skukuza	2007/09/15 14:02:00	Dry	Resting	356850.187704	7235181.44223
Skukuza	2007/09/16 02:01:00	Dry	Active	355938.720439	7235044.78047
Skukuza	2007/09/17 02:02:00	Dry	Active	356773.061706	7234917.20441
Skukuza	2007/09/17 14:03:00	Dry	Resting	356283.573301	7235042.32253
Skukuza	2007/09/18 02:03:00	Dry	Active	359786.527818	7232309.85764
Skukuza	2007/09/18 17:01:00	Dry	Active	356701.011784	7234952.95624
Skukuza	2007/09/19 02:02:00	Dry	Active	356890.630288	7235006.31996
Skukuza	2007/09/20 23:03:00	Dry	Active	355617.20863	7234684.21463
Skukuza	2007/09/21 11:04:00	Dry	Resting	356256.089061	7235038.87896
Skukuza	2007/09/24 02:01:00	Dry	Active	357000.921575	7235025.50082
Skukuza	2007/09/24 20:01:00	Dry	Active	356755.248431	7235304.38959
Skukuza	2007/09/25 14:03:00	Dry	Resting	356909.268943	7235070.06274
Skukuza	2007/09/25 23:01:00	Dry	Active	358870.966824	7235532.33814
Skukuza	2007/09/26 17:02:00	Dry	Active	357761.627799	7233998.63961
Skukuza	2007/09/27 02:01:00	Dry	Active	356738.923182	7235549.39626
Skukuza	2007/09/29 20:01:00	Dry	Active	356670.024327	7235793.85242
Skukuza	2007/09/30 05:01:00	Dry	Active	356896.872366	7234939.68253
Skukuza	2007/09/30 14:04:00	Dry	Resting	356847.856484	7234893.87503
Skukuza	2007/09/30 23:02:00	Dry	Active	356788.681056	7235014.26716
Skukuza	2007/10/02 02:02:00	Wet	Active	357575.477669	7234934.81986
Skukuza	2007/10/02 20:04:00	Wet	Active	361149.935431	7234351.19147
Skukuza	2007/10/03 14:03:00	Wet	Resting	356880.760067	7234909.3175
Skukuza	2007/10/03 23:03:00	Wet	Active	356890.630288	7235006.31996
Skukuza	2007/10/05 02:01:00	Wet	Active	356874.138443	7235012.23183
Skukuza	2007/10/05 20:04:00	Wet	Active	357583.66785	7234680.71439
Skukuza	2007/10/06 23:01:00	Wet	Active	356904.688522	7234997.45311
Skukuza	2007/10/07 20:02:00	Wet	Active	357704.225068	7234739.43215
Skukuza	2007/10/08 05:01:00	Wet	Active	357108.051762	7234796.76627
Skukuza	2007/10/08 23:01:00	Wet	Active	356783.516242	7234977.93222
Skukuza	2007/10/09 08:02:00	Wet	Resting	356855.754637	7234924.15417
Skukuza	2007/10/10 11:02:00	Wet	Resting	356875.564429	7234875.91179
Skukuza	2007/10/10 20:04:00	Wet	Active	356775.066138	7234980.77328
Skukuza	2007/10/11 14:02:00	Wet	Resting	356842.406312	7234884.80412
Skukuza	2007/10/11 23:01:00	Wet	Active	356845.012219	7234890.91576
Skukuza	2007/10/12 17:02:00	Wet	Active	356824.919361	7234966.19678
Skukuza	2007/10/13 02:02:00	Wet	Active	356904.721512	7234994.2986
Skukuza	2007/10/13 20:01:00	Wet	Active	356877.573307	7235469.27136
Skukuza	2007/10/15 20:04:00	Wet	Active	358181.921395	7235491.86404
Skukuza	2007/10/16 05:02:00	Wet	Active	356875.722352	7234860.81519
Skukuza	2007/10/17 17:01:00	Wet	Active	356723.397353	7234913.75491
Skukuza	2007/10/18 11:02:00	Wet	Resting	356840.545203	7234787.88539
Skukuza	2007/10/18 20:02:00	Wet	Active	355706.957687	7235326.72768
Skukuza	2007/10/19 14:03:00	Wet	Resting	356875.722352	7234860.81519
Skukuza	2007/10/21 02:02:00	Wet	Active	356663.96421	7235588.04713
Skukuza	2007/10/21 20:03:00	Wet	Active	356756.173479	7234941.3651
Skukuza	2007/10/23 11:04:00	Wet	Resting	357186.479397	7234149.93826
Skukuza	2007/10/23 20:03:00	Wet	Active	358692.02561	7234165.57511
Skukuza	2007/10/24 05:02:00	Wet	Active	356853.575153	7234857.65398
Skukuza	2007/10/24 23:01:00	Wet	Active	358574.478748	7233537.89914
Skukuza	2007/10/25 08:01:00	Wet	Resting	357216.96373	7234141.24264
Skukuza	2007/10/25 17:04:00	Wet	Active	356731.689351	7234926.01049
Skukuza	2007/10/26 02:01:00	Wet	Active	356709.899625	7235673.25861
Skukuza	2007/10/26 11:01:00	Wet	Resting	356857.051198	7234800.22684
Skukuza	2007/10/26 20:02:00	Wet	Active	358532.891912	7235156.57717
Skukuza	2007/10/29 02:02:00	Wet	Active	359428.556516	7235214.25678
Skukuza	2007/10/29 20:01:00	Wet	Active	355077.83394	7236397.47086
Skukuza	2007/10/31 11:01:00	Wet	Resting	357065.785239	7234360.50376
Skukuza	2007/10/31 20:02:00	Wet	Active	359073.035801	7231987.71137
Skukuza	2007/11/01 14:03:00	Wet	Resting	355754.859364	7235750.88683
Skukuza	2007/11/01 23:02:00	Wet	Active	358500.706953	7234257.34104
Skukuza	2007/11/03 11:01:00	Wet	Resting	357135.648178	7234258.47537
Skukuza	2007/11/03 20:03:00	Wet	Active	355731.225334	7234077.20237
Skukuza	2007/11/04 14:01:00	Wet	Resting	357141.225336	7234255.37876
Skukuza	2007/11/05 17:02:00	Wet	Resting	356568.840574	7234670.11248
Skukuza	2007/11/06 02:03:00	Wet	Active	356705.623039	7236081.76782
Skukuza	2007/11/07 23:03:00	Wet	Active	355463.187073	7235947.46828
Skukuza	2007/11/08 20:01:00	Wet	Active	358195.517092	7236578.39535
Skukuza	2007/11/09 05:02:00	Wet	Active	357012.616895	7234417.41159
Skukuza	2007/11/10 17:01:00	Wet	Resting	357133.581223	7234200.76495
Skukuza	2007/11/11 02:01:00	Wet	Active	356490.386655	7235571.12985
Skukuza	2007/11/14 02:01:00	Wet	Active	356990.548543	7234426.42013
Skukuza	2007/11/14 20:01:00	Wet	Active	356812.778071	7237187.31286
Skukuza	2007/11/16 11:03:00	Wet	Resting	357104.989899	7234303.44987
Skukuza	2007/11/16 20:01:00	Wet	Active	356398.081332	7235951.44919
Skukuza	2007/11/17 23:03:00	Wet	Active	356638.031933	7235436.34226
Skukuza	2007/11/18 08:02:00	Wet	Resting	357029.475104	7236774.93961
Skukuza	2007/11/19 02:03:00	Wet	Active	356747.489545	7236045.69983
Skukuza	2007/11/19 20:02:00	Wet	Active	356744.645044	7236042.74055
Skukuza	2007/11/23 23:01:00	Wet	Active	356627.915013	7235617.86604
Skukuza	2007/11/24 11:02:00	Wet	Resting	357279.674158	7234468.65003
Skukuza	2007/11/24 20:02:00	Wet	Active	357377.182433	7235437.98109
Skukuza	2007/11/25 05:04:00	Wet	Active	356623.775148	7235209.2683
Skukuza	2007/11/25 14:01:00	Wet	Resting	356579.337889	7235236.06964
Skukuza	2007/11/25 23:01:00	Wet	Active	356765.330694	7235126.02025
Skukuza	2007/11/26 08:04:00	Wet	Resting	356999.586718	7234347.64314
Skukuza	2007/11/27 02:01:00	Wet	Active	356648.432005	7235227.77975
Skukuza	2007/11/28 23:01:00	Wet	Active	356577.017781	7235202.69393
Skukuza	2007/11/30 02:01:00	Wet	Active	356623.300615	7235254.55811
Skukuza	2007/11/30 20:01:00	Wet	Active	356627.733347	7235360.74307
Skukuza	2007/12/01 23:01:00	Wet	Active	356520.843914	7235565.36481
Skukuza	2007/12/02 20:03:00	Wet	Active	356736.493986	7236036.57088
Skukuza	2007/12/03 23:04:00	Wet	Active	357249.166085	7235542.5592
Skukuza	2007/12/04 08:03:00	Wet	Resting	355743.992912	7235729.58961
Skukuza	2007/12/04 17:02:00	Wet	Resting	355715.110833	7235605.34379
Skukuza	2007/12/05 02:03:00	Wet	Active	356707.33549	7235918.1839
Skukuza	2007/12/05 11:04:00	Wet	Resting	355738.735446	7235702.26709
Skukuza	2007/12/05 20:03:00	Wet	Active	356352.000276	7234041.37076
Skukuza	2007/12/06 14:02:00	Wet	Resting	357951.601467	7236430.51903
Skukuza	2007/12/06 23:02:00	Wet	Active	356588.291729	7235714.35015
Skukuza	2007/12/08 02:01:00	Wet	Active	360501.988046	7235421.96671
Skukuza	2007/12/08 20:01:00	Wet	Active	358870.33796	7234796.80539
Skukuza	2007/12/09 23:01:00	Wet	Active	356695.128227	7235769.77781
Skukuza	2007/12/10 11:03:00	Wet	Resting	358141.570294	7234332.49226
Skukuza	2007/12/10 20:01:00	Wet	Active	358706.784182	7234068.829
Skukuza	2007/12/11 05:04:00	Wet	Active	358704.05195	7234074.88511
Skukuza	2007/12/11 14:04:00	Wet	Resting	358141.603009	7234329.33775
Skukuza	2007/12/11 23:04:00	Wet	Active	356753.095795	7236039.89948
Skukuza	2007/12/13 02:03:00	Wet	Active	359642.427622	7231046.44483
Skukuza	2007/12/13 11:04:00	Wet	Resting	358169.368754	7234305.51366
Skukuza	2007/12/13 20:02:00	Wet	Active	358152.831921	7234296.10299
Skukuza	2007/12/14 23:04:00	Wet	Active	358655.651075	7232340.57431
Skukuza	2007/12/15 17:02:00	Wet	Resting	357306.822078	7233972.71954
Skukuza	2007/12/17 23:02:00	Wet	Active	356626.777615	7235197.13101
Skukuza	2007/12/18 11:02:00	Wet	Resting	356748.953855	7236965.80578
Skukuza	2007/12/19 05:04:00	Wet	Active	357570.870131	7234568.58397
Skukuza	2007/12/20 08:01:00	Wet	Resting	358110.05088	7234441.00746
Skukuza	2007/12/20 17:02:00	Wet	Resting	358115.688629	7234432.0521
Skukuza	2007/12/21 02:02:00	Wet	Active	356715.477444	7235670.16215
Skukuza	2007/12/21 20:03:00	Wet	Active	357967.805811	7233801.12547
Skukuza	2007/12/22 14:02:00	Wet	Resting	358107.474906	7234431.96691
Skukuza	2007/12/22 23:02:00	Wet	Active	355923.128871	7234185.13885
Skukuza	2007/12/24 02:02:00	Wet	Active	356709.932651	7235670.1041
Skukuza	2007/12/24 20:04:00	Wet	Active	356780.584486	7236043.11663
Skukuza	2007/12/25 23:01:00	Wet	Active	356553.52676	7236915.31045
Skukuza	2007/12/26 20:02:00	Wet	Active	359867.107891	7234144.31355
Skukuza	2007/12/27 05:04:00	Wet	Active	357093.060134	7234914.69143
Skukuza	2007/12/27 23:03:00	Wet	Active	359480.55447	7237411.67097
Skukuza	2007/12/29 11:03:00	Wet	Resting	357957.00429	7236424.49076
Skukuza	2007/12/30 23:02:00	Wet	Active	357356.063609	7234548.09278
Skukuza	2007/12/31 17:02:00	Wet	Resting	357279.208166	7235300.85038
Skukuza	2008/01/01 02:02:00	Wet	Active	357230.22262	7235251.88988
Skukuza	2008/01/02 23:03:00	Wet	Active	356736.370512	7236578.30325
Skukuza	2008/01/03 20:04:00	Wet	Active	357271.057351	7235294.68101
Skukuza	2008/01/04 05:04:00	Wet	Active	358827.714906	7234369.78707
Skukuza	2008/01/04 23:01:00	Wet	Active	358053.647901	7235899.0859
Skukuza	2008/01/05 08:02:00	Wet	Resting	355401.219865	7234503.4574
Skukuza	2008/01/05 17:04:00	Wet	Resting	357284.501359	7235325.01766
Skukuza	2008/01/06 02:01:00	Wet	Active	356574.29632	7235717.13301
Skukuza	2008/01/06 20:01:00	Wet	Active	357928.397058	7234669.20046
Skukuza	2008/01/07 23:02:00	Wet	Active	356445.171583	7236729.61582
Skukuza	2008/01/08 17:01:00	Wet	Resting	357326.547841	7233676.36879
Skukuza	2008/01/09 02:02:00	Wet	Active	359286.533219	7234825.42951
Skukuza	2008/01/09 20:01:00	Wet	Active	356734.338121	7235712.72482
Skukuza	2008/01/25 02:08:00	Wet	Active	356230.808616	7235861.80782
Skukuza	2008/01/25 02:29:00	Wet	Active	357047.402018	7233997.2775
Skukuza	2008/01/27 10:00:00	Wet	Resting	358713.836044	7236051.03854
Skukuza	2008/02/01 12:29:00	Wet	Resting	356936.376946	7234068.67842
Skukuza	2008/02/01 17:16:00	Wet	Resting	356958.126655	7234090.08854
Skukuza	2008/02/01 22:03:00	Wet	Active	356718.067099	7235697.45624
Skukuza	2008/02/02 18:09:00	Wet	Active	355885.910651	7235613.00241
Skukuza	2008/02/03 19:07:00	Wet	Active	355016.114792	7236484.47792
Skukuza	2008/02/04 00:01:00	Wet	Active	356655.339116	7235627.16718
Skukuza	2008/02/04 20:02:00	Wet	Active	356718.161453	7235688.44335
Skukuza	2008/02/05 02:05:00	Wet	Active	354726.536928	7237797.89427
Skukuza	2008/02/05 14:03:00	Wet	Resting	357103.948939	7237039.14679
Skukuza	2008/02/06 02:02:00	Wet	Active	356597.585187	7235611.4639
Skukuza	2008/02/06 14:08:00	Wet	Resting	356597.585187	7235611.4639
Skukuza	2008/02/07 02:01:00	Wet	Active	357395.013816	7234515.37291
Skukuza	2008/02/11 02:05:00	Wet	Active	357387.761424	7235211.16749
Skukuza	2008/02/12 02:08:00	Wet	Active	354788.322816	7233794.77686
Skukuza	2008/02/13 02:02:00	Wet	Active	356384.860268	7235645.51425
Skukuza	2008/02/14 02:01:00	Wet	Active	357826.835142	7234086.97734
Skukuza	2008/02/14 14:02:00	Wet	Resting	354599.414446	7238065.83688
Skukuza	2008/02/15 02:08:00	Wet	Active	358569.882014	7233704.38213
Skukuza	2008/02/17 02:05:00	Wet	Active	356386.544066	7235739.50174
Skukuza	2008/02/17 14:07:00	Wet	Resting	359594.988363	7233506.05071
Skukuza	2008/02/18 02:05:00	Wet	Active	356439.258048	7235452.51164
Skukuza	2008/02/19 02:08:00	Wet	Active	359932.294309	7235319.24972
Skukuza	2008/02/20 02:04:00	Wet	Active	358363.193328	7237167.15484
Skukuza	2008/02/21 02:02:00	Wet	Active	356684.505725	7234940.61461
Skukuza	2008/02/22 02:04:00	Wet	Active	357418.683593	7234884.73733
Skukuza	2008/02/23 02:03:00	Wet	Active	356431.524564	7235661.1021
Skukuza	2008/02/24 02:01:00	Wet	Active	356499.921656	7235719.50828
Skukuza	2008/02/25 02:03:00	Wet	Active	356215.795944	7235453.09517
Skukuza	2008/02/26 05:02:00	Wet	Active	361178.838318	7233688.75048
Skukuza	2008/02/28 01:02:00	Wet	Active	361005.65148	7233635.61299
Skukuza	2008/02/28 23:01:00	Wet	Active	356420.115866	7235691.4043
Skukuza	2008/02/29 08:03:00	Wet	Resting	355738.702197	7235705.42161
Skukuza	2008/03/03 00:01:00	Wet	Active	356664.654173	7235796.7257
Skukuza	2008/03/03 22:03:00	Wet	Active	358380.977981	7239182.59615
Skukuza	2008/03/04 20:04:00	Wet	Active	356669.034663	7235633.39498
Skukuza	2008/03/05 05:08:00	Wet	Active	355744.62938	7235669.20307
Skukuza	2008/03/05 16:06:00	Wet	Resting	355754.890235	7235747.95764
Skukuza	2008/03/06 14:02:00	Wet	Resting	355740.781704	7235780.93508
Skukuza	2008/03/07 01:02:00	Wet	Active	356614.005839	7234573.68655
Skukuza	2008/03/07 23:07:00	Wet	Active	357279.02133	7235594.47492
Skukuza	2008/03/08 08:02:00	Wet	Resting	356943.673742	7234156.41481
Skukuza	2008/03/08 19:02:00	Wet	Active	355446.464977	7233351.05158
Skukuza	2008/03/10 13:05:00	Wet	Resting	356987.409513	7234196.30792
Skukuza	2008/03/11 00:03:00	Wet	Active	356168.623429	7235485.95091
Skukuza	2008/03/11 11:01:00	Wet	Resting	358554.711691	7234118.86134
Skukuza	2008/03/11 22:01:00	Wet	Active	356426.041226	7235655.18555
Skukuza	2008/03/12 20:01:00	Wet	Active	356343.487691	7233541.91046
Skukuza	2008/03/13 05:02:00	Wet	Active	357355.674941	7233797.68393
Skukuza	2008/03/15 01:06:00	Wet	Active	357488.459308	7235067.09351
Skukuza	2008/03/15 23:01:00	Wet	Active	356434.716361	7235630.93905
Skukuza	2008/03/16 08:05:00	Wet	Resting	355858.71008	7235582.51936
Skukuza	2008/03/16 19:02:00	Wet	Active	357406.323213	7234494.30821
Skukuza	2008/03/17 17:07:00	Wet	Resting	356500.295901	7233843.26941
Skukuza	2008/03/18 13:04:00	Wet	Resting	354924.394063	7235254.90539
Skukuza	2008/03/19 00:02:00	Wet	Active	358983.709284	7232625.41978
Skukuza	2008/03/19 22:02:00	Wet	Active	356115.529863	7233445.76892
Skukuza	2008/03/20 20:02:00	Wet	Active	356954.781508	7234940.28808
Skukuza	2008/03/21 05:03:00	Wet	Active	356084.824225	7235857.34416
Skukuza	2008/03/21 16:08:00	Wet	Resting	355728.870116	7235605.48884
Skukuza	2008/03/23 01:04:00	Wet	Active	358031.492585	7234570.21706
Skukuza	2008/03/23 23:03:00	Wet	Active	356127.374656	7235736.77986
Skukuza	2008/03/24 08:01:00	Wet	Resting	357233.960925	7234362.26001
Skukuza	2008/03/24 19:03:00	Wet	Active	356635.18759	7235433.38295
Skukuza	2008/03/25 17:01:00	Wet	Active	357338.591675	7234372.36549
Skukuza	2008/03/27 22:08:00	Wet	Active	355676.643861	7236097.99949
Skukuza	2008/03/28 02:45:00	Wet	Active	356358.770082	7235509.13065
Skukuza	2008/03/28 04:45:00	Wet	Active	357117.371742	7234690.95058
Skukuza	2008/03/28 06:45:00	Wet	Resting	357218.038679	7234038.27031
Skukuza	2008/03/28 19:15:00	Wet	Active	357865.796464	7234329.62953
Skukuza	2008/03/28 19:30:00	Wet	Active	358662.259482	7234104.87495
Skukuza	2008/03/28 19:45:00	Wet	Active	359211.211881	7233822.99625
Skukuza	2008/03/28 20:00:00	Wet	Active	359800.721511	7234149.71754
Skukuza	2008/03/28 20:15:00	Wet	Active	360358.341177	7234645.7701
Skukuza	2008/03/28 20:31:00	Wet	Active	359525.197736	7235203.08062
Skukuza	2008/03/28 20:48:00	Wet	Active	358627.815895	7235033.39295
Skukuza	2008/03/28 22:45:00	Wet	Active	357863.722166	7234529.26473
Skukuza	2008/03/29 16:06:00	Wet	Resting	358676.580529	7234050.48931
Skukuza	2008/03/30 14:08:00	Wet	Resting	355777.371928	7236752.79472
Skukuza	2008/03/31 01:02:00	Wet	Active	358663.145108	7234834.10198
Skukuza	2008/04/01 08:01:00	Dry	Resting	356513.841278	7233080.83457
Skukuza	2008/04/01 19:02:00	Dry	Active	357220.832737	7234026.35609
Skukuza	2008/04/03 13:07:00	Dry	Resting	356835.222406	7234766.64707
Skukuza	2008/04/04 00:02:00	Dry	Active	359698.91146	7237090.09066
Skukuza	2008/04/04 11:08:00	Dry	Resting	356820.829711	7234827.11483
Skukuza	2008/04/04 22:01:00	Dry	Active	358019.115459	7234694.25427
Skukuza	2008/04/06 05:02:00	Dry	Active	358071.664239	7234162.30686
Skukuza	2008/04/08 01:05:00	Dry	Active	356634.356817	7235257.82881
Skukuza	2008/04/08 23:07:00	Dry	Active	358759.455904	7234317.70369
Skukuza	2008/04/09 08:06:00	Dry	Resting	355803.408675	7235860.46675
Skukuza	2008/04/09 19:06:00	Dry	Active	356592.144951	7234543.26085
Skukuza	2008/04/11 13:02:00	Dry	Resting	356929.882979	7234159.42542
Skukuza	2008/04/12 00:05:00	Dry	Active	357631.863669	7234272.66293
Skukuza	2008/04/12 11:04:00	Dry	Resting	356480.786513	7235174.41794
Skukuza	2008/04/12 22:03:00	Dry	Active	356335.509157	7234301.47423
Skukuza	2008/04/14 05:02:00	Dry	Active	359926.750406	7234777.46579
Skukuza	2008/04/16 01:01:00	Dry	Active	356368.79579	7235591.03696
Skukuza	2008/04/17 08:03:00	Dry	Resting	359157.087602	7233734.55433
Skukuza	2008/04/17 19:08:00	Dry	Active	359496.376913	7236410.17936
Skukuza	2008/04/18 17:03:00	Dry	Active	356495.336954	7235099.07918
Skukuza	2008/04/19 13:07:00	Dry	Resting	356875.227866	7232533.87291
Skukuza	2008/04/20 00:02:00	Dry	Active	356681.583613	7234964.69615
Skukuza	2008/04/20 22:02:00	Dry	Active	356687.729945	7234907.29699
Skukuza	2008/04/21 20:03:00	Dry	Active	353943.460846	7235180.92199
Skukuza	2008/04/22 05:01:00	Dry	Active	355588.572384	7234517.60528
Skukuza	2008/04/24 23:02:00	Dry	Active	356371.254887	7236668.22231
Skukuza	2008/04/25 19:05:00	Dry	Active	354698.7138	7235213.07484
Skukuza	2008/04/27 13:02:00	Dry	Resting	357615.090346	7233773.12032
Skukuza	2008/04/28 00:04:00	Dry	Active	355524.865569	7233763.36699
Skukuza	2008/04/28 11:02:00	Dry	Resting	356578.597144	7234797.31068
Skukuza	2008/04/28 22:04:00	Dry	Active	356831.414038	7234875.44987
Skukuza	2008/04/30 05:04:00	Dry	Active	356510.347825	7237880.24328
Skukuza	2008/04/30 16:02:00	Dry	Resting	357969.561934	7237075.19341
Skukuza	2008/05/02 01:02:00	Dry	Active	356839.722371	7234866.52292
Skukuza	2008/05/02 23:02:00	Dry	Active	359625.387847	7236187.51082
Skukuza	2008/05/03 08:02:00	Dry	Resting	356106.399124	7234840.80233
Skukuza	2008/05/03 19:01:00	Dry	Active	356117.585213	7234831.68071
Skukuza	2008/05/04 17:07:00	Dry	Active	358456.486964	7234005.84836
Skukuza	2008/05/06 00:01:00	Dry	Active	357773.843657	7234147.04459
Skukuza	2008/05/06 22:03:00	Dry	Active	359753.532564	7234185.51423
Skukuza	2008/05/08 05:04:00	Dry	Active	358973.566897	7233608.72307
Skukuza	2008/05/10 01:03:00	Dry	Active	356885.057509	7233438.74636
Skukuza	2008/05/11 08:01:00	Dry	Resting	356964.387747	7233766.33004
Skukuza	2008/05/11 19:01:00	Dry	Resting	356784.37238	7234896.14017
Skukuza	2008/05/14 22:02:00	Dry	Active	358549.167563	7234118.804
Skukuza	2008/05/15 20:04:00	Dry	Active	357385.484339	7234109.64947
Skukuza	2008/05/16 05:02:00	Dry	Active	358345.693752	7234313.42512
Skukuza	2008/05/18 01:01:00	Dry	Active	361338.866552	7235850.96116
Skukuza	2008/05/18 23:02:00	Dry	Active	361087.409638	7235088.7806
Skukuza	2008/05/19 08:02:00	Dry	Resting	356983.625514	7233772.61562
Skukuza	2008/05/19 19:01:00	Dry	Active	356164.679262	7233497.66538
Skukuza	2008/05/20 17:02:00	Dry	Active	356983.816378	7233754.36448
Skukuza	2008/05/21 13:03:00	Dry	Resting	356994.871413	7233757.63495
Skukuza	2008/05/22 00:02:00	Dry	Active	356755.785146	7234723.45031
Skukuza	2008/05/22 11:01:00	Dry	Resting	356986.422096	7233760.47611
Skukuza	2008/05/22 22:05:00	Dry	Active	357063.531045	7233770.52149
Skukuza	2008/05/23 20:01:00	Dry	Active	356494.131796	7235213.99369
Skukuza	2008/05/24 05:01:00	Dry	Active	356764.908982	7234911.26004
Skukuza	2008/05/24 16:06:00	Dry	Resting	356381.535985	7235179.46099
Skukuza	2008/05/25 14:05:00	Dry	Resting	356997.477136	7233763.74657
Skukuza	2008/05/26 23:01:00	Dry	Active	356636.493664	7233212.14692
Skukuza	2008/05/27 08:01:00	Dry	Resting	356576.00806	7234770.01651
Skukuza	2008/05/27 19:01:00	Dry	Active	356835.602018	7234730.37015
Skukuza	2008/05/28 17:02:00	Dry	Active	357125.451522	7233386.72625
Skukuza	2008/05/29 13:07:00	Dry	Resting	357011.234504	7233763.89042
Skukuza	2008/05/30 00:01:00	Dry	Active	356860.86174	7234691.19871
Skukuza	2008/05/30 22:04:00	Dry	Active	358124.025696	7234162.85008
Skukuza	2008/05/31 20:01:00	Dry	Active	356869.090059	7234709.53792
Skukuza	2008/06/01 05:01:00	Dry	Active	359316.999741	7234798.47611
Skukuza	2008/06/02 14:02:00	Dry	Resting	356994.74418	7233769.80237
Skukuza	2008/06/03 01:03:00	Dry	Active	357392.417455	7235828.66507
Skukuza	2008/06/03 23:02:00	Dry	Active	357286.54236	7234066.25225
Skukuza	2008/06/04 08:02:00	Dry	Resting	356997.795215	7233733.32802
Skukuza	2008/06/04 19:02:00	Dry	Active	356989.39102	7233751.49327
Skukuza	2008/06/05 17:03:00	Dry	Active	358848.642787	7233695.09357
Skukuza	2008/06/06 13:07:00	Dry	Resting	357695.225663	7234025.2158
Skukuza	2008/06/07 00:01:00	Dry	Active	356506.343979	7232738.67767
Skukuza	2008/06/07 00:01:00	Dry	Active	356506.343979	7232738.67767
Skukuza	2008/06/07 11:03:00	Dry	Resting	356623.990252	7234150.13801
Skukuza	2008/06/08 20:02:00	Dry	Active	357495.580854	7234915.73489
Skukuza	2008/06/09 05:03:00	Dry	Active	357289.038582	7234102.55914
Skukuza	2008/06/09 16:02:00	Dry	Resting	356604.307983	7234186.21262
Skukuza	2008/06/10 14:01:00	Dry	Resting	356621.146199	7234147.17868
Skukuza	2008/06/11 01:02:00	Dry	Active	356494.473702	7235710.21193
Skukuza	2008/06/11 23:01:00	Dry	Active	356215.659993	7234430.24066
Skukuza	2008/06/12 08:01:00	Dry	Resting	359145.572341	7233516.75224
Skukuza	2008/06/12 19:01:00	Dry	Active	358198.282649	7236569.18484
Skukuza	2008/06/14 13:04:00	Dry	Resting	357483.190953	7233995.74108
Skukuza	2008/06/15 00:01:00	Dry	Active	355285.194051	7233745.73454
Skukuza	2008/06/15 11:01:00	Dry	Resting	357060.48254	7233806.77053
Skukuza	2008/06/15 22:04:00	Dry	Active	357344.497837	7235401.35965
Skukuza	2008/06/16 20:01:00	Dry	Active	358067.04512	7233796.07142
Skukuza	2008/06/17 05:03:00	Dry	Active	353423.453708	7237366.2147
Skukuza	2008/06/17 16:03:00	Dry	Resting	356284.479306	7235229.82121
Skukuza	2008/06/28 19:01:00	Dry	Active	356073.532082	7235603.03334
Skukuza	2008/06/29 17:04:00	Dry	Active	357912.100498	7233845.84144
Skukuza	2008/07/05 01:02:00	Dry	Active	361237.033813	7234470.15505
Skukuza	2009/04/14 11:01:00	Dry	Resting	357154.35842	7235043.10315
Skukuza	2009/04/15 10:03:00	Dry	Resting	357151.245192	7235046.2255
Skukuza	2009/04/17 10:00:00	Dry	Resting	359132.686642	7233491.83152
Skukuza	2009/04/18 10:00:00	Dry	Resting	356914.738911	7233722.54398
Skukuza	2009/04/19 11:01:00	Dry	Resting	356539.792521	7235109.68597
Skukuza	2009/04/20 11:00:00	Dry	Resting	356909.640943	7233719.11043
Skukuza	2009/04/21 11:00:00	Dry	Resting	357411.562874	7233125.15545
Skukuza	2009/04/22 10:01:00	Dry	Resting	356549.516571	7232557.72564
Skukuza	2009/04/23 10:01:00	Dry	Resting	356924.823816	7233720.39602
Skukuza	2009/04/23 11:00:00	Dry	Resting	356907.712783	7233726.75207
Skukuza	2009/04/24 19:00:00	Dry	Active	355794.516133	7235437.3951
Skukuza	2009/04/24 21:00:00	Dry	Active	356431.799796	7235399.92747
Skukuza	2009/04/25 04:00:00	Dry	Active	356588.720117	7232559.26375
Skukuza	2009/04/25 09:01:00	Dry	Resting	356913.863128	7233708.11259
Skukuza	2009/04/25 19:03:00	Dry	Active	356070.533447	7234326.18114
Skukuza	2009/04/26 00:01:00	Dry	Active	358023.420949	7232815.81249
Skukuza	2009/04/26 05:01:00	Dry	Active	356963.197565	7233723.05092
Skukuza	2009/04/26 15:01:00	Dry	Resting	356919.851026	7233724.6256
Skukuza	2009/04/26 20:02:00	Dry	Active	356912.720941	7233719.14266
Skukuza	2009/04/27 05:01:00	Dry	Active	356528.819148	7235098.5289
Skukuza	2009/04/27 15:00:00	Dry	Resting	356704.139259	7234948.48205
Skukuza	2009/04/27 21:00:00	Dry	Active	359358.140072	7236290.90492
Skukuza	2009/04/28 00:00:00	Dry	Active	356349.245696	7235281.65514
Skukuza	2009/04/28 04:00:00	Dry	Active	356434.143109	7231323.85909
Skukuza	2009/04/28 09:02:00	Dry	Resting	356838.042282	7232751.39474
Skukuza	2009/04/28 14:03:00	Dry	Resting	356820.089872	7232740.16468
Skukuza	2009/04/29 00:00:00	Dry	Active	356789.459032	7233155.15959
Skukuza	2009/04/29 04:02:00	Dry	Active	356588.788674	7232552.72938
Skukuza	2009/04/29 09:03:00	Dry	Resting	356817.092697	7232732.24611
Skukuza	2009/04/29 19:00:00	Dry	Active	357009.49125	7234991.563
Skukuza	2009/04/29 23:00:00	Dry	Active	356941.930344	7234990.85678
Skukuza	2009/04/30 04:01:00	Dry	Active	356821.222667	7232730.0359
Skukuza	2009/04/30 09:01:00	Dry	Resting	356816.042503	7232734.48859
Skukuza	2009/04/30 19:00:00	Dry	Active	356475.827641	7235333.91184
Skukuza	2009/04/30 21:00:00	Dry	Active	356427.214588	7235641.22633
Skukuza	2009/04/30 23:00:00	Dry	Active	356933.577248	7235004.06492
Skukuza	2009/05/01 19:00:00	Dry	Active	358458.042471	7236456.49602
Skukuza	2009/05/01 21:00:00	Dry	Active	358864.585625	7235613.39651
Skukuza	2009/05/01 23:00:00	Dry	Active	356676.178765	7232893.69589
Skukuza	2009/05/02 04:02:00	Dry	Active	356583.896553	7232549.29783
Skukuza	2009/05/02 09:00:00	Dry	Resting	356819.07508	7232739.02731
Skukuza	2009/05/02 21:00:00	Dry	Active	357559.036678	7234166.66789
Skukuza	2009/05/03 04:00:00	Dry	Active	356639.951183	7235096.31348
Skukuza	2009/05/03 09:00:00	Dry	Resting	356510.608567	7235111.63344
Skukuza	2009/05/03 14:00:00	Dry	Resting	356511.566818	7235118.17856
Skukuza	2009/05/03 19:02:00	Dry	Active	356810.849311	7234976.19016
Skukuza	2009/05/03 20:00:00	Dry	Active	356709.379189	7234918.79109
Skukuza	2009/05/04 04:01:00	Dry	Active	356812.673901	7234978.46273
Skukuza	2009/05/04 09:01:00	Dry	Resting	356543.864174	7235113.10887
Skukuza	2009/05/04 19:03:00	Dry	Active	355928.17777	7236534.21784
Skukuza	2009/05/05 00:01:00	Dry	Active	359109.849043	7233456.21702
Skukuza	2009/05/05 05:01:00	Dry	Active	356665.472873	7232563.44903
Skukuza	2009/05/05 10:01:00	Dry	Resting	356822.110018	7232743.3407
Skukuza	2009/05/05 20:01:00	Dry	Active	360356.173231	7234455.78313
Skukuza	2009/05/05 21:00:00	Dry	Active	360863.29348	7234326.87123
Skukuza	2009/05/06 00:00:00	Dry	Active	360637.827956	7233276.95281
Skukuza	2009/05/06 09:01:00	Dry	Resting	356811.126659	7232733.31036
Skukuza	2009/05/06 14:02:00	Dry	Resting	356815.995301	7232738.99505
Skukuza	2009/05/06 19:01:00	Dry	Active	354394.533464	7237396.40352
Skukuza	2009/05/06 20:00:00	Dry	Active	356878.119336	7236929.74887
Skukuza	2009/05/06 22:00:00	Dry	Active	356733.0642	7237286.98373
Skukuza	2009/05/07 00:00:00	Dry	Active	356476.26871	7236349.55613
Skukuza	2009/05/07 04:00:00	Dry	Active	357107.198263	7235193.14236
Skukuza	2009/05/07 09:01:00	Dry	Resting	356435.274856	7235068.70328
Skukuza	2009/05/07 20:00:00	Dry	Active	356917.995107	7235060.46407
Skukuza	2009/05/07 22:00:00	Dry	Active	357407.55788	7234769.91999
Skukuza	2009/05/07 23:00:00	Dry	Active	357307.689005	7234952.7616
Skukuza	2009/05/08 04:01:00	Dry	Active	357100.131497	7234906.20211
Skukuza	2009/05/08 09:00:00	Dry	Resting	356781.591421	7232749.67669
Skukuza	2009/05/08 14:02:00	Dry	Resting	357114.895106	7233492.97983
Skukuza	2009/05/08 20:00:00	Dry	Active	355570.979545	7235756.38419
Skukuza	2009/05/08 22:00:00	Dry	Active	353689.265179	7236885.00608
Skukuza	2009/05/09 00:00:00	Dry	Active	357201.049002	7236473.41397
Skukuza	2009/05/09 04:01:00	Dry	Active	357039.873437	7234973.17669
Skukuza	2009/05/09 14:01:00	Dry	Resting	357082.936738	7234920.44471
Skukuza	2009/05/09 19:00:00	Dry	Active	356673.955093	7232518.24304
Skukuza	2009/05/09 21:00:00	Dry	Active	357574.656506	7232667.14765
Skukuza	2009/05/09 23:01:00	Dry	Active	355062.968911	7234252.21935
Skukuza	2009/05/10 09:03:00	Dry	Resting	356973.19312	7235182.95383
Skukuza	2009/05/10 23:00:00	Dry	Active	356355.107206	7232318.843
Skukuza	2009/05/11 00:00:00	Dry	Active	357556.146562	7230582.26675
Skukuza	2009/05/11 04:00:00	Dry	Active	356982.515063	7233702.07031
Skukuza	2009/05/11 09:01:00	Dry	Resting	357326.427976	7234022.50038
Skukuza	2009/05/11 14:03:00	Dry	Resting	357330.626391	7234013.75565
Skukuza	2009/05/12 04:01:00	Dry	Active	357129.811084	7234778.06437
Skukuza	2009/05/12 09:01:00	Dry	Resting	356937.888866	7235082.75608
Skukuza	2009/05/12 19:02:00	Dry	Active	356724.575193	7234918.95023
Skukuza	2009/05/12 21:00:00	Dry	Active	357584.594392	7234335.26789
Skukuza	2009/05/12 23:01:00	Dry	Active	358822.315119	7232068.72688
Skukuza	2009/05/13 04:01:00	Dry	Active	356664.660092	7232640.96018
Skukuza	2009/05/13 09:00:00	Dry	Resting	355933.296285	7234526.19763
Skukuza	2009/05/13 14:01:00	Dry	Resting	356401.391356	7234833.53565
Skukuza	2009/05/14 02:00:00	Dry	Active	356144.874857	7233408.66987
Skukuza	2009/05/14 07:01:00	Dry	Active	356425.292903	7235060.93673
Skukuza	2009/05/14 12:01:00	Dry	Resting	356431.108674	7235074.29326
Skukuza	2009/05/14 17:01:00	Dry	Active	356724.83002	7234894.6154
Skukuza	2009/05/14 22:01:00	Dry	Active	356836.126767	7231973.69941
Skukuza	2009/05/15 00:00:00	Dry	Active	356029.470603	7233447.34192
Skukuza	2009/05/15 04:01:00	Dry	Active	356322.666352	7233197.81064
Skukuza	2009/05/15 09:03:00	Dry	Resting	356405.211932	7233120.03137
Skukuza	2009/05/15 14:02:00	Dry	Resting	356409.306592	7233121.20111
Skukuza	2009/05/15 20:00:00	Dry	Active	353344.76773	7236523.46508
Skukuza	2009/05/15 22:00:00	Dry	Active	356286.335147	7231087.49176
Skukuza	2009/05/16 00:00:00	Dry	Active	356067.766303	7233437.82975
Skukuza	2009/05/16 04:00:00	Dry	Active	358859.411467	7236015.58377
Skukuza	2009/05/16 20:00:00	Dry	Active	358798.624382	7235935.18476
Skukuza	2009/05/16 22:00:00	Dry	Active	357585.74778	7234323.11119
Skukuza	2009/05/17 04:01:00	Dry	Active	357334.804083	7233908.56224
Skukuza	2009/05/17 09:02:00	Dry	Resting	357093.341253	7233826.26843
Skukuza	2009/05/17 19:01:00	Dry	Active	359322.680213	7234745.35316
Skukuza	2009/05/17 21:00:00	Dry	Active	358801.649076	7235940.62424
Skukuza	2009/05/17 23:01:00	Dry	Active	358796.491701	7235942.82449
Skukuza	2009/05/18 04:00:00	Dry	Active	358358.70105	7236112.26784
Skukuza	2009/05/18 09:01:00	Dry	Resting	358406.848629	7236143.63824
Skukuza	2009/05/18 14:00:00	Dry	Resting	358410.783259	7236140.52411
Skukuza	2009/05/18 19:01:00	Dry	Active	358796.503323	7235941.69789
Skukuza	2009/05/18 21:00:00	Dry	Active	358803.553146	7235935.23561
Skukuza	2009/05/18 23:00:00	Dry	Active	359003.912301	7235207.18374
Skukuza	2009/05/19 04:01:00	Dry	Active	356654.853053	7234634.5077
Skukuza	2009/05/19 09:01:00	Dry	Resting	356651.737431	7234637.85527
Skukuza	2009/05/19 14:03:00	Dry	Resting	356659.063875	7234624.63654
Skukuza	2009/05/19 19:01:00	Dry	Active	357324.860064	7235039.24841
Skukuza	2009/05/19 21:00:00	Dry	Active	355416.958593	7233616.87662
Skukuza	2009/05/19 23:00:00	Dry	Active	356542.356801	7232652.97271
Skukuza	2009/05/20 04:03:00	Dry	Active	354740.714858	7238281.86728
Skukuza	2009/05/20 09:01:00	Dry	Resting	357361.701608	7233928.67332
Skukuza	2009/05/20 14:01:00	Dry	Resting	356724.936198	7234884.47589
Skukuza	2009/05/20 20:00:00	Dry	Active	360702.050805	7236973.68861
Skukuza	2009/05/20 22:00:00	Dry	Active	357727.087498	7234713.30441
Skukuza	2009/05/21 04:01:00	Dry	Active	355728.377245	7235964.01216
Skukuza	2009/05/21 09:01:00	Dry	Resting	357098.384653	7233815.27912
Skukuza	2009/05/21 19:03:00	Dry	Active	356536.805904	7236746.8012
Skukuza	2009/05/21 21:00:00	Dry	Active	358898.50147	7234754.2803
Skukuza	2009/05/22 04:01:00	Dry	Active	358561.665111	7236009.13028
Skukuza	2009/05/22 09:01:00	Dry	Resting	358803.875857	7236800.1122
Skukuza	2009/05/22 14:02:00	Dry	Resting	358792.281213	7236848.89242
Skukuza	2009/05/22 20:00:00	Dry	Active	358880.76722	7235199.3793
Skukuza	2009/05/22 22:00:00	Dry	Active	356756.60696	7231959.57058
Skukuza	2009/05/23 00:00:00	Dry	Active	357516.489249	7232258.88853
Skukuza	2009/05/23 14:01:00	Dry	Resting	356676.530035	7234878.56057
Skukuza	2009/05/23 20:00:00	Dry	Active	356708.538854	7234900.97986
Skukuza	2009/05/23 22:00:00	Dry	Active	355926.81624	7230913.11556
Skukuza	2009/05/24 00:01:00	Dry	Active	355874.514988	7230810.706
Skukuza	2009/05/24 20:00:00	Dry	Active	356814.973995	7234856.79937
Skukuza	2009/05/24 23:00:00	Dry	Active	358615.170823	7236197.84614
Skukuza	2009/05/25 04:00:00	Dry	Active	358798.580219	7235939.46586
Skukuza	2009/05/25 09:01:00	Dry	Resting	358633.330415	7235911.16946
Skukuza	2009/05/25 14:00:00	Dry	Resting	358639.251092	7235914.61079
Skukuza	2009/05/25 20:02:00	Dry	Active	356729.00675	7235162.5969
Skukuza	2009/05/25 22:01:00	Dry	Active	355600.391129	7235168.53592
Skukuza	2009/05/26 00:00:00	Dry	Active	354839.264712	7234412.77462
Skukuza	2009/05/26 14:01:00	Dry	Resting	357271.072539	7233148.02703
Skukuza	2009/05/26 20:00:00	Dry	Active	356660.290926	7234781.94182
Skukuza	2009/05/26 23:00:00	Dry	Active	355410.734154	7233720.02057
Skukuza	2009/05/27 23:00:00	Dry	Active	356916.728558	7234985.18494
Skukuza	2009/05/28 04:03:00	Dry	Active	354662.111185	7233323.13159
Skukuza	2009/05/28 09:00:00	Dry	Resting	357100.289672	7233829.4959
Skukuza	2009/05/28 22:01:00	Dry	Active	356822.421986	7234733.83778
Skukuza	2009/05/29 09:01:00	Dry	Resting	356576.962521	7234659.38095
Skukuza	2009/05/29 14:02:00	Dry	Resting	356567.676995	7234663.5652
Skukuza	2009/05/29 20:00:00	Dry	Active	356659.193357	7234788.69074
Skukuza	2009/05/29 22:00:00	Dry	Active	358267.25183	7236652.82602
Skukuza	2009/05/30 00:00:00	Dry	Active	358277.609222	7235156.63969
Skukuza	2009/05/30 09:02:00	Dry	Resting	356957.365862	7234182.47293
Skukuza	2009/05/30 14:01:00	Dry	Resting	356955.555172	7234159.24324
Skukuza	2009/05/30 20:00:00	Dry	Active	356474.187789	7233180.69818
Skukuza	2009/05/30 22:00:00	Dry	Active	357246.158393	7234649.70448
Skukuza	2009/05/31 04:00:00	Dry	Active	354540.553309	7229561.4185
Skukuza	2009/05/31 09:01:00	Dry	Resting	356237.268551	7233644.45426
Skukuza	2009/05/31 14:00:00	Dry	Resting	356653.409045	7234478.32686
Skukuza	2009/05/31 19:01:00	Dry	Active	357443.550585	7234114.53638
Skukuza	2009/05/31 22:01:00	Dry	Active	356722.042114	7236220.30265
Skukuza	2009/06/01 04:00:00	Dry	Active	356220.405323	7233236.62227
Skukuza	2009/06/01 14:01:00	Dry	Resting	359802.62843	7233022.33796
Skukuza	2009/06/01 21:00:00	Dry	Active	356856.220357	7234977.79164
Skukuza	2009/06/01 23:00:00	Dry	Active	357954.677462	7234472.07017
Skukuza	2009/06/02 04:00:00	Dry	Active	357284.218701	7234210.22465
Skukuza	2009/06/02 09:00:00	Dry	Resting	357086.29346	7233812.8993
Skukuza	2009/06/02 14:00:00	Dry	Resting	357087.263622	7233818.31777
Skukuza	2009/06/02 20:00:00	Dry	Active	358115.795367	7235768.57912
Skukuza	2009/06/02 22:00:00	Dry	Active	357177.813578	7234724.25698
Skukuza	2009/06/03 00:00:00	Dry	Active	355082.484572	7233069.56849
Skukuza	2009/06/03 04:00:00	Dry	Active	356570.429235	7234401.06429
Skukuza	2009/06/03 09:01:00	Dry	Resting	356585.518368	7234411.36312
Skukuza	2009/06/03 14:01:00	Dry	Resting	356734.50585	7234362.89719
Skukuza	2009/06/03 20:00:00	Dry	Active	359140.460273	7236267.48448
Skukuza	2009/06/03 22:00:00	Dry	Active	358316.147036	7236314.41287
Skukuza	2009/06/04 00:01:00	Dry	Active	356918.55483	7235871.26786
Skukuza	2009/06/04 04:00:00	Dry	Active	356765.689514	7235130.98164
Skukuza	2009/06/04 14:01:00	Dry	Resting	355309.903187	7234011.23159
Skukuza	2009/06/04 19:00:00	Dry	Active	357084.151218	7234804.17842
Skukuza	2009/06/04 21:00:00	Dry	Active	353974.885033	7233680.20096
Skukuza	2009/06/05 04:00:00	Dry	Active	356673.827488	7234744.45064
Skukuza	2009/06/05 09:02:00	Dry	Resting	356044.361537	7234900.76831
Skukuza	2009/06/05 19:01:00	Dry	Active	356642.116296	7234791.66667
Skukuza	2009/06/05 21:01:00	Dry	Active	352610.073899	7232746.34977
Skukuza	2009/06/05 23:00:00	Dry	Active	353017.377046	7233634.56303
Skukuza	2009/06/06 04:01:00	Dry	Active	355639.293222	7234362.42489
Skukuza	2009/06/06 09:00:00	Dry	Resting	356560.239806	7234413.12621
Skukuza	2009/06/06 20:00:00	Dry	Active	352798.272498	7234396.59787
Skukuza	2009/06/06 22:00:00	Dry	Active	355759.069527	7234202.11367
Skukuza	2009/06/07 00:01:00	Dry	Active	359321.038096	7234106.25832
Skukuza	2009/06/07 04:00:00	Dry	Active	359319.268857	7234098.5784
Skukuza	2009/06/07 09:00:00	Dry	Resting	359245.301179	7233922.72431
Skukuza	2009/06/07 14:02:00	Dry	Resting	359349.316508	7234012.35497
Skukuza	2009/06/07 22:00:00	Dry	Active	356799.38205	7234914.0997
Skukuza	2009/06/08 04:01:00	Dry	Active	356727.551648	7234928.89667
Skukuza	2009/06/08 19:02:00	Dry	Active	357761.056605	7234646.05375
Skukuza	2009/06/09 04:01:00	Dry	Active	357133.934492	7236311.14044
Skukuza	2009/06/09 09:01:00	Dry	Resting	356922.07092	7234179.8503
Skukuza	2009/06/09 21:00:00	Dry	Active	358952.239231	7235518.07789
Skukuza	2009/06/10 20:00:00	Dry	Active	356683.856591	7235728.19594
Skukuza	2009/06/10 22:01:00	Dry	Active	357287.720283	7235607.18504
Skukuza	2009/06/11 09:00:00	Dry	Resting	355812.586676	7235535.16114
Skukuza	2009/06/11 21:01:00	Dry	Active	360489.362419	7234364.07515
Skukuza	2009/06/11 23:00:00	Dry	Active	359272.592092	7234204.2357
Skukuza	2009/06/12 09:01:00	Dry	Resting	354460.824672	7234311.17717
Skukuza	2009/06/12 20:00:00	Dry	Active	357970.714809	7234490.03903
Skukuza	2009/06/12 22:00:00	Dry	Active	361696.522453	7234075.05046
Skukuza	2009/06/13 19:02:00	Dry	Active	357118.321151	7233459.88959
Skukuza	2009/06/14 00:00:00	Dry	Active	356809.477775	7234714.77315
Skukuza	2009/06/14 09:03:00	Dry	Resting	356750.656745	7234840.57716
Skukuza	2009/06/14 20:00:00	Dry	Active	356890.120602	7235015.7792
Skukuza	2009/06/14 22:00:00	Dry	Active	356896.77739	7235046.94671
Skukuza	2009/06/15 00:01:00	Dry	Active	357314.492615	7234300.45386
Skukuza	2009/06/15 04:00:00	Dry	Active	352697.58351	7233257.93991
Skukuza	2009/06/15 09:00:00	Dry	Resting	356891.520502	7234881.93772
Skukuza	2009/06/15 14:01:00	Dry	Resting	356705.204301	7235121.33448
Skukuza	2009/06/16 04:01:00	Dry	Active	358216.674962	7235190.26099
Skukuza	2009/06/16 09:01:00	Dry	Resting	357495.10318	7234212.42335
Skukuza	2009/06/16 19:00:00	Dry	Active	357499.131405	7234200.2966
Skukuza	2009/06/16 21:00:00	Dry	Active	358240.621976	7236387.99498
Skukuza	2009/06/16 22:00:00	Dry	Active	358310.340373	7236280.10029
Skukuza	2009/06/17 00:00:00	Dry	Active	359270.468476	7234131.20208
Skukuza	2009/06/17 04:00:00	Dry	Active	356995.771158	7234280.44981
Skukuza	2009/06/17 20:00:00	Dry	Active	356717.630935	7234895.66675
Skukuza	2009/06/17 22:00:00	Dry	Active	355884.368196	7234082.64776
Skukuza	2009/06/18 00:00:00	Dry	Active	352978.162103	7233347.26932
Skukuza	2009/06/18 04:01:00	Dry	Active	356750.0764	7234896.00649
Skukuza	2009/06/18 09:00:00	Dry	Resting	356730.025062	7234869.20557
Skukuza	2009/06/18 19:01:00	Dry	Active	356937.127346	7234762.75541
Skukuza	2009/06/18 21:00:00	Dry	Active	356821.383453	7234734.95365
Skukuza	2009/06/18 23:00:00	Dry	Active	356840.421924	7234740.78656
Skukuza	2009/06/19 04:01:00	Dry	Active	358386.785612	7235740.28797
Skukuza	2009/06/19 20:00:00	Dry	Active	356827.397511	7234729.38291
Skukuza	2009/06/20 05:00:00	Dry	Active	357078.320734	7233809.43578
Skukuza	2009/06/20 10:02:00	Dry	Resting	357024.274195	7233871.96807
Skukuza	2009/06/20 15:01:00	Dry	Resting	356991.772288	7233877.26193
Skukuza	2009/06/20 20:02:00	Dry	Active	360936.595677	7233358.6397
Skukuza	2009/06/20 22:00:00	Dry	Active	357074.028919	7233453.79302
Skukuza	2009/06/21 00:01:00	Dry	Active	356039.280209	7230781.34537
Skukuza	2009/06/21 04:02:00	Dry	Active	358618.272305	7236195.85007
Skukuza	2009/06/21 09:01:00	Dry	Resting	358654.667741	7236291.32148
Skukuza	2009/06/21 19:00:00	Dry	Active	358896.416008	7235653.61077
Skukuza	2009/06/21 21:00:00	Dry	Active	358786.00822	7234610.25073
Skukuza	2009/06/21 23:00:00	Dry	Active	356969.715015	7235024.4986
Skukuza	2009/06/22 09:00:00	Dry	Resting	357326.746132	7234385.76276
Skukuza	2009/06/22 14:01:00	Dry	Resting	357439.477578	7234308.29209
Skukuza	2009/06/22 19:01:00	Dry	Active	358963.896784	7234387.19134
Skukuza	2009/06/22 21:00:00	Dry	Active	359448.185832	7234902.80692
Skukuza	2009/06/22 23:00:00	Dry	Active	359129.183547	7234031.27186
Skukuza	2009/06/23 21:00:00	Dry	Active	356429.363261	7235436.40817
Skukuza	2009/06/24 00:00:00	Dry	Active	359201.845516	7234713.01255
Skukuza	2009/08/20 14:00:00	Dry	Resting	357370.79279	7233923.35981
Skukuza	2009/08/20 19:05:00	Dry	Active	356715.447705	7234927.64319
Skukuza	2009/08/21 00:00:00	Dry	Active	356690.408951	7234906.42366
Skukuza	2009/08/21 04:01:00	Dry	Active	356809.456053	7234913.0784
Skukuza	2009/08/21 09:03:00	Dry	Resting	356965.528478	7234364.18808
Skukuza	2009/08/21 19:00:00	Dry	Active	357048.490445	7235032.98363
Skukuza	2009/08/21 21:00:00	Dry	Active	356514.823345	7234416.03012
Skukuza	2009/08/21 23:00:00	Dry	Active	354069.781619	7232831.6435
Skukuza	2009/08/22 04:01:00	Dry	Active	357060.131093	7233918.98974
Skukuza	2009/08/22 09:01:00	Dry	Resting	357059.382299	7233892.39095
Skukuza	2009/08/22 14:00:00	Dry	Resting	356201.846934	7234513.47415
Skukuza	2009/08/22 20:00:00	Dry	Active	356466.142284	7234436.47673
Skukuza	2009/08/22 22:01:00	Dry	Active	356640.891225	7234810.58301
Skukuza	2009/08/23 00:00:00	Dry	Active	356664.617452	7234761.02985
Skukuza	2009/08/23 04:01:00	Dry	Active	356899.904989	7233687.91062
Skukuza	2009/08/23 09:01:00	Dry	Resting	356919.966541	7233713.58479
Skukuza	2009/08/23 20:00:00	Dry	Active	359248.367738	7233525.02176
Skukuza	2009/08/23 22:00:00	Dry	Active	359152.604572	7233511.86708
Skukuza	2009/08/24 00:00:00	Dry	Active	359152.581364	7233514.12029
Skukuza	2009/08/24 04:00:00	Dry	Active	359144.50392	7233520.79745
Skukuza	2009/08/24 14:00:00	Dry	Resting	359138.629555	7233493.01947
Skukuza	2009/08/24 20:00:00	Dry	Active	355757.30533	7235226.5279
Skukuza	2009/08/24 22:02:00	Dry	Active	355724.012768	7233787.55355
Skukuza	2009/08/25 00:00:00	Dry	Active	356124.800105	7233501.52746
Skukuza	2009/08/25 23:00:00	Dry	Active	358562.686753	7234241.30648
Skukuza	2009/08/30 21:01:00	Dry	Active	356521.75399	7237222.80127
Skukuza	2009/08/31 00:00:00	Dry	Active	354303.174838	7233475.47916
Skukuza	2009/09/02 06:03:00	Dry	Active	356631.764526	7234623.22374
Skukuza	2009/09/04 00:00:00	Dry	Active	356999.431344	7234892.98126
Skukuza	2009/09/04 06:01:00	Dry	Active	356979.167513	7234316.78245
Skukuza	2009/09/05 00:00:00	Dry	Active	356928.382554	7235029.47481
Skukuza	2009/09/05 09:02:00	Dry	Resting	356285.223229	7235041.66382
Skukuza	2009/09/06 18:01:00	Dry	Active	355819.621466	7234205.00556
Skukuza	2009/09/08 18:00:00	Dry	Active	358583.75443	7234944.82759
Skukuza	2009/09/09 15:00:00	Dry	Resting	357890.739444	7234300.81902
Skukuza	2009/09/10 15:01:00	Dry	Resting	357116.201366	7234626.03845
Skukuza	2009/09/10 18:00:00	Dry	Active	358958.192638	7234462.39782
Skukuza	2009/09/11 06:01:00	Dry	Active	356671.901375	7234928.31382
Skukuza	2009/09/12 21:00:00	Dry	Active	356260.85042	7232358.6401
Skukuza	2009/09/13 18:00:00	Dry	Active	355709.444213	7231529.85545
Skukuza	2009/09/14 06:01:00	Dry	Active	356237.567105	7234671.14231
Skukuza	2009/09/14 21:01:00	Dry	Active	356714.930638	7234878.96278
Skukuza	2009/09/15 06:00:00	Dry	Active	356283.217027	7235037.1358
Skukuza	2009/09/15 15:01:00	Dry	Resting	356683.1983	7235104.65367
Skukuza	2009/09/16 06:00:00	Dry	Active	356281.27946	7235026.07341
Skukuza	2009/09/17 00:01:00	Dry	Active	356660.807771	7234830.62225
Skukuza	2009/09/17 06:01:00	Dry	Active	356276.997253	7235042.70416
Skukuza	2009/09/17 15:01:00	Dry	Resting	356273.176007	7235035.0022
Skukuza	2009/09/18 00:00:00	Dry	Active	359369.065668	7235227.61687
Skukuza	2009/09/19 06:00:00	Dry	Active	356676.043968	7235121.02908
Skukuza	2009/09/19 18:00:00	Dry	Active	358883.185581	7235164.02507
Skukuza	2009/09/20 15:03:00	Dry	Resting	356696.789602	7235160.00607
Skukuza	2009/09/21 00:00:00	Dry	Active	356154.710799	7236125.79154
Skukuza	2009/09/21 09:00:00	Dry	Resting	357060.302464	7234079.43868
Skukuza	2009/09/21 21:00:00	Dry	Active	359090.616007	7234346.35774
Skukuza	2009/09/22 21:00:00	Dry	Active	355767.65713	7234634.19683
Skukuza	2009/09/25 21:00:00	Dry	Active	355935.966805	7234175.1334
Skukuza	2009/09/26 18:00:00	Dry	Active	359167.974009	7234771.47893
Skukuza	2009/09/26 21:03:00	Dry	Active	357126.047013	7234941.8522
Skukuza	2009/09/27 06:01:00	Dry	Active	356687.144909	7235120.01861
Skukuza	2009/09/28 18:00:00	Dry	Active	356910.417183	7234999.54114
Skukuza	2009/09/28 21:00:00	Dry	Active	354245.141051	7235125.32248
Skukuza	2009/09/30 00:01:00	Dry	Active	356683.304265	7234898.46209
Skukuza	2009/09/30 06:00:00	Dry	Active	357063.02227	7234113.94521
Skukuza	2009/09/30 21:01:00	Dry	Active	355615.674262	7232573.35783
Skukuza	2009/10/01 00:00:00	Wet	Active	356527.979413	7232672.87779
Skukuza	2009/10/01 21:00:00	Wet	Active	357401.789029	7233471.63719
Skukuza	2009/10/02 06:01:00	Wet	Active	356563.361189	7234311.30187
Skukuza	2009/10/02 15:02:00	Wet	Resting	356214.341636	7233422.69606
Skukuza	2009/10/02 21:01:00	Wet	Active	358891.99061	7235485.23249
Skukuza	2009/10/03 06:02:00	Wet	Active	357058.928011	7235193.76495
Skukuza	2009/10/03 18:00:00	Wet	Active	356751.134399	7234991.11406
Skukuza	2009/10/04 00:01:00	Wet	Active	356156.941869	7233413.30378
Skukuza	2009/10/04 15:00:00	Wet	Resting	358350.603998	7233660.87428
Skukuza	2009/10/04 18:00:00	Wet	Active	357396.400834	7234953.68649
Skukuza	2009/10/06 21:00:00	Wet	Active	354613.585713	7234178.94409
Skukuza	2009/10/08 21:00:00	Wet	Active	356677.666848	7232555.91506
Skukuza	2009/10/10 18:01:00	Wet	Active	358210.509342	7236479.39869
Skukuza	2009/10/12 00:00:00	Wet	Active	356599.979746	7232542.93148
Skukuza	2009/10/12 21:00:00	Wet	Active	356941.418012	7236965.78969
Skukuza	2009/10/14 18:01:00	Wet	Active	356894.597647	7234980.44655
Skukuza	2009/10/19 06:00:00	Wet	Active	356266.7653	7234198.66949
Skukuza	2009/10/20 09:01:00	Wet	Resting	356762.795996	7234838.45078
Skukuza	2009/10/20 18:00:00	Wet	Active	359766.900966	7234724.44977
Skukuza	2009/10/20 21:01:00	Wet	Active	359549.420349	7233404.17754
Skukuza	2009/10/21 15:00:00	Wet	Resting	356709.855862	7234873.27595
Skukuza	2009/10/21 18:03:00	Wet	Active	354865.215772	7237291.88001
Skukuza	2009/10/22 12:00:00	Wet	Resting	358356.992654	7233638.85655
Skukuza	2009/10/22 21:01:00	Wet	Active	358952.635612	7232850.89553
Skukuza	2009/10/23 06:01:00	Wet	Active	356749.186518	7234294.54535
Skukuza	2009/10/24 18:01:00	Wet	Active	357318.449585	7234590.5164
Skukuza	2009/10/24 21:00:00	Wet	Active	356604.394059	7232611.48357
Skukuza	2009/10/26 00:01:00	Wet	Active	358588.60795	7235150.84341
Skukuza	2009/10/26 09:02:00	Wet	Resting	358350.965497	7233725.10163
Skukuza	2009/10/26 21:00:00	Wet	Active	354241.957454	7234094.08836
Skukuza	2009/10/29 06:01:00	Wet	Active	356556.344105	7234314.6085
Skukuza	2009/10/29 18:00:00	Wet	Active	357129.509906	7234806.90562
Skukuza	2009/10/29 21:00:00	Wet	Active	357442.913395	7234471.25352
Skukuza	2009/10/30 06:01:00	Wet	Active	357341.53878	7234404.84616
Skukuza	2009/10/31 18:00:00	Wet	Active	357692.980469	7235366.45371
Skukuza	2009/11/01 06:02:00	Wet	Active	356751.700337	7234348.65504
Skukuza	2009/11/01 15:02:00	Wet	Resting	356750.683061	7234347.74299
Skukuza	2009/11/02 06:02:00	Wet	Active	356749.623312	7234350.88676
Skukuza	2009/11/03 06:01:00	Wet	Active	356758.021068	7234333.39761
Skukuza	2009/11/03 15:02:00	Wet	Resting	356754.801715	7234346.65939
Skukuza	2009/11/03 21:00:00	Wet	Active	356648.469719	7232540.05988
Skukuza	2009/11/04 06:03:00	Wet	Active	356750.673623	7234348.64429
Skukuza	2009/11/04 21:00:00	Wet	Active	356750.929921	7234716.41371
Skukuza	2009/11/05 00:02:00	Wet	Active	356776.189149	7234912.7302
Skukuza	2009/11/05 06:03:00	Wet	Resting	356751.700337	7234348.65504
Skukuza	2009/11/05 15:02:00	Wet	Resting	356742.710088	7234344.27929
Skukuza	2009/11/06 06:00:00	Wet	Active	356753.775001	7234346.64864
Skukuza	2009/11/06 21:01:00	Wet	Active	358090.952691	7234381.54335
Skukuza	2009/11/07 00:00:00	Wet	Active	355964.373368	7234071.32172
Skukuza	2009/11/07 21:00:00	Wet	Active	356707.805769	7235657.4624
Skukuza	2009/11/08 06:01:00	Wet	Resting	356740.576428	7234351.91875
Skukuza	2009/11/09 00:00:00	Wet	Active	356639.888085	7234808.31903
Skukuza	2009/11/09 06:00:00	Wet	Active	356735.487693	7234347.58386
Skukuza	2009/11/10 00:03:00	Wet	Active	356688.49499	7235089.16019
Skukuza	2009/11/10 09:00:00	Wet	Resting	358790.57237	7233571.45539
Skukuza	2009/11/10 18:01:00	Wet	Active	356662.517349	7235628.14375
Skukuza	2009/11/10 21:00:00	Wet	Active	356785.404674	7234993.72628
Skukuza	2009/11/11 06:01:00	Wet	Resting	359899.536444	7235188.89087
Skukuza	2009/11/11 15:03:00	Wet	Resting	359519.199575	7235167.18927
Skukuza	2009/11/12 00:01:00	Wet	Active	356262.524613	7232785.24204
Skukuza	2009/11/12 09:00:00	Wet	Resting	356833.225475	7235153.77243
Skukuza	2009/11/12 21:01:00	Wet	Active	358425.105839	7234081.4651
Skukuza	2009/11/17 00:00:00	Wet	Active	356901.325118	7235004.85439
Skukuza	2009/11/17 09:00:00	Wet	Resting	356694.612708	7234877.62325
Skukuza	2009/11/17 18:00:00	Wet	Active	354698.992122	7235264.23203
Skukuza	2009/11/18 06:00:00	Wet	Active	357298.264512	7233926.88483
Skukuza	2009/11/19 00:00:00	Wet	Active	359601.555867	7236688.88217
Skukuza	2009/11/19 09:00:00	Wet	Resting	354680.406204	7235776.70366
Skukuza	2009/11/19 21:01:00	Wet	Active	355914.869044	7234247.92398
